# Supplementary material for: Soil microbial communities are more disrupted by extreme drought than by gradual climate shifts under different land-use intensities
Source: Front Microbiol. 2025 Aug 7;16:1649443. doi: 10.3389/fmicb.2025.1649443 (PMC12367804; doi:10.3389/fmicb.2025.1649443)
Supplement: Supplementary file 1 [file Table_1.XLSX]

## Sheet: Table S1
Table S1: Soil abiotic and microbial parameters in 2022 (dry) and 2023 (wet/normal spring). Mean values and standard deviation are reported for each land use type (n=20), climate (n = 50) and land use type per climate (n =10).
		climate				land use										climate:land use
		ambient		future		CF		OF		IM		EM		EP		CF - A		CF - F		OF - A		OF - F		IM - A		IM - F		EM - A		EM - F		EP - A		EP - F
		mean	± SD	mean	± SD	mean	± SD	mean	± SD	mean	± SD	mean	± SD	mean	± SD	mean	± SD	mean	± SD	mean	± SD	mean	± SD	mean	± SD	mean	± SD	mean	± SD	mean	± SD	mean	± SD	mean	± SD
2022 (dry spring)	TC	1.92	0.102765	1.98	0.149203	1.88541	0.0642107	1.83766	0.102253	1.97086	0.126493	2.0348	0.111485	2.01751	0.131726	1.87591	0.0576399	1.89491	0.07198	1.81062	0.0454958	1.8647	0.135568	1.9405	0.0606412	2.00123	0.167488	1.97739	0.107204	2.09221	0.0861507	1.9959	0.11013	2.03912	0.153183
	TN	0.16	0.0116495	0.16	0.0153344	0.159073	0.00794891	0.157693	0.01434	0.162085	0.0106347	0.170631	0.0172962	0.163851	0.0138734	0.158972	0.0093713	0.159174	0.00674884	0.158217	0.016105	0.157169	0.013196	0.161426	0.00766483	0.162745	0.0133807	0.165512	0.0153309	0.17575	0.0183927	0.163932	0.00833612	0.163769	0.0183527
	soil moisture	9.15	1.19935	9.28	1.55469	9.96	1.06514	9.97675	1.11376	8.012	1.06122	9.5225	1.38282	8.618	1.24968	9.786	0.826074	10.134	1.28274	9.7785	1.07103	10.175	1.17658	8.147	1.07597	7.877	1.08595	9.361	0.940177	9.684	1.75925	8.693	1.35373	8.543	1.20493
	pH	6.56	0.548879	6.87	0.483353	6.7865	0.510183	6.782	0.619394	6.7395	0.501078	6.536	0.544508	6.727	0.548856	6.627	0.565902	6.946	0.415591	6.507	0.653742	7.057	0.463131	6.595	0.569586	6.884	0.399032	6.384	0.525234	6.688	0.546541	6.673	0.517452	6.781	0.601433
	P availability	62.2	30.2488	77.8	35.9325	65.931	31.8378	69.258	34.5904	80.24	33.3745	64.171	37.6431	70.4885	34.8982	62.77	33.6511	69.092	31.3898	53.483	22.7208	85.033	38.1667	70.707	31.7149	89.773	33.8184	54.372	27.3458	73.97	45.0587	69.911	37.1708	71.066	34.4771
	K availability	81.5	38.3174	78	30.0493	106.177	38.2754	89.9725	19.5668	53.5155	17.3187	51.839	12.6587	97.324	35.1111	108.445	49.0162	103.909	26.0532	89.726	17.7495	90.219	22.2055	56.254	14.4625	50.777	20.1835	49.128	9.5578	54.55	15.1858	103.885	42.7487	90.763	26.0663
	Nmin	4.98	5.24986	4.78	3.98069	11.7148	6.17862	3.26151	3.19836	3.67553	2.14895	2.92722	1.02106	2.82064	1.09102	13.2279	7.35598	10.2018	5.105	2.24833	0.631401	4.27469	4.47787	3.95969	2.80556	3.39137	1.52231	2.84309	0.676938	3.01136	1.36741	2.63138	1.07347	3.0099	1.19848
	Cmic	289	61.3048	294	58.1531	259.904	33.3953	232.731	35.7561	307.934	38.6979	340.067	66.9401	316.854	48.2609	253.304	32.3984	266.504	34.7554	221.345	36.5587	244.116	32.7788	307.988	42.4118	307.88	36.9146	333.908	65.9169	346.226	70.9262	326.817	40.2239	306.891	55.4839
	Cmic/Corg	14.9	2.62124	14.9	2.52565	13.7905	1.74979	12.6804	1.90957	15.6409	1.8374	16.6755	2.97578	15.7171	2.20438	13.4947	1.60888	14.0863	1.91852	12.2459	2.13596	13.1149	1.64812	15.8418	1.86901	15.44	1.88263	16.8095	2.85115	16.5415	3.2443	16.3445	1.42641	15.0897	2.71091
	qCO2	0.67	0.598344	1.34	0.831989	1.30286	0.65286	0.850108	1.23585	1.03058	0.435324	1.11983	0.75683	0.729751	0.767098	1.14041	0.563165	1.46532	0.758863	0.172322	0.213315	1.52789	1.4975	0.913024	0.466167	1.14814	0.417769	0.634232	0.662908	1.60543	0.509725	0.51392	0.725426	0.945582	0.825402
	µmax	0.19	0.0187417	0.21	0.0259282	0.201938	0.025504	0.232659	0.0204598	0.18402	0.0160119	0.190785	0.024708	0.202218	0.00984454	0.187554	0.0156046	0.213446	0.0273103	0.214177	0.0130979	0.247444	0.00967885	0.179734	0.0201466	0.188306	0.0111826	0.175577	0.00895922	0.205993	0.0267414	0.199757	0.00872049	0.204186	0.0112204
	MUB.Cel/Cmic	0.26	0.0814975	0.25	0.0638984	0.324711	0.0602443	0.271872	0.0709404	0.265252	0.0657934	0.224679	0.0588414	0.201664	0.0497926	0.354829	0.0488115	0.294593	0.0571287	0.298411	0.0744071	0.245332	0.0593518	0.262918	0.0660838	0.267586	0.0689881	0.218226	0.0524373	0.231133	0.0668363	0.181386	0.03837	0.221943	0.0533665
	MUB.Xyl/Cmic	0.15	0.0488329	0.15	0.0411692	0.161894	0.0370473	0.15122	0.0458674	0.167744	0.0500926	0.131114	0.0437026	0.127734	0.0386013	0.169607	0.0405779	0.154182	0.0334478	0.161253	0.050744	0.141187	0.0405308	0.168561	0.0628906	0.166928	0.0366147	0.131725	0.0425675	0.130502	0.0471086	0.114259	0.0228688	0.141209	0.0471085
	MUB.Glu/Cmic	1.88	0.45377	1.94	0.44018	2.10736	0.321642	2.04354	0.482214	1.90209	0.445704	1.78488	0.459258	1.69949	0.432963	2.14256	0.333906	2.07217	0.322732	2.10305	0.548656	1.98403	0.426621	1.84858	0.405609	1.95559	0.498494	1.76205	0.457534	1.80771	0.484537	1.54003	0.2841	1.85895	0.508455
	MUB.Nag/Cmic	0.66	0.179712	0.71	0.211592	0.650386	0.169285	0.734478	0.194082	0.689192	0.150554	0.660498	0.229014	0.693596	0.24344	0.695328	0.203313	0.605444	0.121139	0.723325	0.204557	0.745631	0.193392	0.673861	0.167541	0.704523	0.138779	0.621111	0.192421	0.699885	0.265046	0.606504	0.142561	0.780688	0.296532
	MUB.Pho/Cmic	1.36	0.471731	1.29	0.395214	1.4193	0.407918	1.38976	0.467709	1.33748	0.42222	1.2651	0.47995	1.21732	0.42455	1.49474	0.478598	1.34386	0.331026	1.5166	0.523129	1.26291	0.390374	1.39398	0.521796	1.28098	0.31142	1.28828	0.527485	1.24193	0.454823	1.12141	0.255784	1.31324	0.542809
	MUB.Sul/Cmic	0.08	0.0236511	0.08	0.0323604	0.0743808	0.0242904	0.0718485	0.03243	0.0801714	0.025613	0.0926931	0.0312613	0.087199	0.0252613	0.0742009	0.022026	0.0745608	0.0275752	0.0762652	0.0240912	0.0674318	0.0399566	0.0750515	0.022927	0.0852914	0.0283027	0.0950025	0.0259887	0.0903837	0.0370926	0.0812148	0.022581	0.0931833	0.0275262
	MUB.Cel	72.7	16.7044	72.1	15.3482	83.2442	12.3473	61.3972	9.86659	80.7704	18.1573	73.6937	12.4808	62.8134	13.9979	89.3394	12.9073	77.149	8.526	64.0268	8.90009	58.7675	10.5327	79.7788	15.7022	81.7621	21.1485	71.2702	15.0882	76.1172	9.38851	58.9709	13.0989	66.6559	14.4658
	MUB.Xyl	41.4	10.5691	41.9	9.87486	41.3516	7.33983	33.9434	5.79186	51.048	13.0872	42.3024	7.32617	39.4986	8.8139	42.2005	8.23918	40.5027	6.65183	34.2936	5.295	33.5931	6.5199	50.9673	14.9494	51.1287	11.7508	42.0753	7.27933	42.5294	7.75926	37.2717	8.38054	41.7255	9.09659
	MUB.Glu	524	99.0636	553	99.243	541.57	66.0069	462.255	57.1016	578.774	120.947	584.293	92.3371	527.905	109.161	536.426	66.8955	546.714	68.2944	450.3	53.5062	474.21	60.8519	563.655	111.783	593.894	133.711	570.815	117.058	597.771	62.3977	501.156	100.082	554.654	116.404
	MUB.Nag	186	43.2149	202	52.4811	166.266	36.5806	165.815	27.8878	210.638	43.3839	214.265	48.7832	212.71	58.2657	173.031	45.4372	159.502	25.6658	154.419	21.2399	177.211	30.0354	206.102	47.1199	215.175	41.3211	200.462	46.6507	228.068	49.2376	195.019	37.3671	230.401	71.2405
	MUB.Pho	375	89.503	366	81.9894	360.338	79.1927	310.121	57.3938	404.095	97.771	405.401	80.4397	372.206	82.9389	369.598	97.1326	351.078	60.1207	319.865	49.548	300.378	65.4837	418.255	116.407	389.935	78.6406	407.162	88.6539	403.64	76.116	361.387	66.0358	383.024	99.5049
	MUB.Sul	23.2	8.37377	23.8	9.16014	18.8972	5.17507	16.2584	6.51351	24.4295	7.10964	30.0352	6.92745	27.8715	9.72846	18.6194	5.3294	19.1749	5.28814	16.5845	4.95333	15.9323	8.04946	22.974	6.89803	25.8849	7.377	30.8634	7.21091	29.207	6.91301	26.8577	9.21538	28.8854	10.6111
		climate				land use										climate:land use
		ambient		future		CF		OF		IM		EM		EP		CF - A		CF - F		OF - A		OF - F		IM - A		IM - F		EM - A		EM - F		EP - A		EP - F
		mean	± SD	mean	± SD	mean	± SD	mean	± SD	mean	± SD	mean	± SD	mean	± SD	mean	± SD	mean	± SD	mean	± SD	mean	± SD	mean	± SD	mean	± SD	mean	± SD	mean	± SD	mean	± SD	mean	± SD
2023 (normal spring)	TC	1.93	0.112863	1.98	0.135241	1.89792	0.0913101	1.85492	0.0954821	1.96069	0.0937917	2.02327	0.119134	2.04571	0.132527	1.90058	0.102981	1.89525	0.0835503	1.83057	0.0464899	1.87926	0.125573	1.96269	0.116147	1.95868	0.0712181	1.96077	0.125372	2.08577	0.0745899	1.99147	0.102042	2.09994	0.141876
	TN	0.16	0.0118473	0.16	0.0105651	0.155715	0.0114217	0.151421	0.0101369	0.156051	0.00772192	0.162871	0.011964	0.164262	0.0121804	0.153774	0.014616	0.157656	0.00730784	0.147404	0.00697217	0.155437	0.0115095	0.155365	0.0098964	0.156736	0.00518633	0.159294	0.0141996	0.166447	0.00849257	0.16027	0.0100482	0.168255	0.0132974
	soil moisture	10.4	1.51311	11.2	1.92822	10.44	1.88404	11.67	1.52328	9.2705	1.39051	11.518	1.34627	11.121	1.7864	10.32	1.95732	10.56	1.90538	11.218	1.21405	12.122	1.72357	8.981	0.996688	9.56	1.7036	10.785	0.916106	12.251	1.33904	10.488	1.55893	11.754	1.84833
	pH	6.51	0.525088	6.83	0.473597	6.7625	0.505641	6.6625	0.60971	6.7045	0.46807	6.5535	0.508809	6.6605	0.563284	6.626	0.558912	6.899	0.431237	6.407	0.61471	6.918	0.511725	6.57	0.526646	6.839	0.380743	6.383	0.479538	6.724	0.501978	6.567	0.530975	6.754	0.607018
	P availability	61.5	31.377	75.9	35.2144	68.29	32.4263	67.8725	33.3248	80.0845	33.5954	59.4535	37.0509	67.7685	35.1069	65.187	35.0252	71.393	31.1705	57.242	26.281	78.503	37.452	67.41	28.7309	92.759	34.6448	50.364	29.2028	68.543	43.1471	67.452	40.2815	68.085	31.2908
	K availability	77.3	44.3594	87	51.1179	102.844	44.322	118.894	39.4213	47.0735	29.3165	40.1095	13.2724	101.918	46.7412	102.836	55.2593	102.853	33.0689	108.529	27.8366	129.258	47.6147	46.779	27.0075	47.368	32.9365	36.355	12.3257	43.864	13.7346	92.174	35.6428	111.662	55.9539
	Nmin	5.15	1.51286	5.99	1.94188	5.3018	1.43779	4.3289	0.918328	5.4719	1.18609	5.9652	2.09273	6.7848	2.34193	4.625	1.44395	5.9786	1.19213	4.379	0.747694	4.2788	1.15419	5.4062	1.28114	5.5376	1.23013	5.0056	1.57606	6.9248	2.25118	6.3534	2.12826	7.2162	2.7103
	Cmic	279	69.8518	300	93.539	287.059	54.169	281.688	70.8072	259.153	71.3655	322.254	100.84	297.553	105.092	288.001	34.6306	286.117	70.6636	273.656	75.4157	289.72	68.9456	251.966	83.336	266.34	60.7642	296.973	69.987	347.535	123.081	282.573	84.0893	312.533	125.483
	Cmic/Corg	14.5	3.67105	15.1	4.45965	15.135	2.7941	15.1903	3.76681	13.208	3.6116	16.0057	5.18363	14.4717	4.67477	15.1516	1.59406	15.1185	3.73361	14.9942	4.29845	15.3864	3.37522	12.8338	4.2568	13.5822	3.01748	15.241	3.89867	16.7703	6.34244	14.1738	3.99735	14.7697	5.47348
	Cmic/Nmic	13.2	2.85833	11.7	4.43144	11.781	2.77033	13.0149	3.15373	12.7918	3.05754	13.0043	3.7004	11.6138	2.46621	12.6818	3.03878	10.8803	2.45067	13.161	3.77099	12.8688	2.84689	14.524	2.77456	11.0595	2.41544	13.5854	2.73296	12.4233	4.743	11.9941	2.81236	11.2335	2.32678
	qCO2	2.91	1.07686	3.13	1.5566	2.58452	1.05606	3.05955	1.42319	2.92752	1.563	2.96946	1.29584	3.53555	1.58718	2.51086	1.1271	2.65818	1.03538	3.01673	1.42255	3.10237	1.49942	2.95077	1.99503	2.9066	1.16061	2.76053	1.30757	3.17839	1.31843	3.29013	1.24774	3.78098	1.90459
	µmax	0.19	0.0177702	0.21	0.029421	0.183077	0.0154198	0.204298	0.0310651	0.190405	0.0197649	0.213391	0.0204869	0.210647	0.03735	0.18075	0.0220109	0.185403	0.00608022	0.186596	0.0201988	0.222	0.0313041	0.181823	0.0156184	0.201133	0.0209834	0.196319	0.0189999	0.223635	0.0142911	0.196038	0.015951	0.222335	0.047064
	MUB.Cel/Cmic	0.22	0.110396	0.2	0.0953282	0.240932	0.091965	0.150206	0.054157	0.273046	0.141332	0.198264	0.0885613	0.176958	0.0847666	0.245793	0.0549495	0.23607	0.121585	0.174118	0.0508864	0.126293	0.0482879	0.309458	0.183563	0.236635	0.0743451	0.198806	0.0965045	0.197723	0.085111	0.166059	0.0582661	0.187858	0.107286
	MUB.Xyl/Cmic	0.17	0.0702092	0.15	0.0556454	0.159449	0.0458315	0.124816	0.0436374	0.207876	0.0887802	0.148993	0.0558902	0.145183	0.0492648	0.160839	0.0279364	0.158058	0.0604128	0.136225	0.0391338	0.113407	0.0468968	0.238214	0.108736	0.177538	0.0526377	0.15063	0.0587648	0.147357	0.0559934	0.141321	0.0452768	0.149045	0.0551414
	MUB.Glu/Cmic	1.96	0.742932	1.79	0.593112	1.78159	0.475707	1.62727	0.624373	2.20417	0.938303	1.91923	0.641204	1.855	0.564053	1.81578	0.238298	1.7474	0.646804	1.7901	0.727754	1.46444	0.484207	2.48964	1.22623	1.91869	0.41702	1.83393	0.555509	2.00452	0.737028	1.88209	0.525825	1.82792	0.627328
	MUB.Nag/Cmic	0.73	0.307747	0.67	0.271545	0.573762	0.211387	0.528535	0.150277	0.862084	0.338921	0.758685	0.322982	0.769848	0.277188	0.566826	0.127315	0.580699	0.279317	0.560855	0.143837	0.496215	0.157052	1.00443	0.414294	0.719734	0.160713	0.713327	0.270959	0.804043	0.377141	0.787612	0.308568	0.752084	0.257464
	MUB.Pho/Cmic	1.51	0.582947	1.36	0.57748	1.24177	0.390867	1.26881	0.421569	1.73987	0.726627	1.42762	0.609884	1.49004	0.631598	1.21632	0.276829	1.26722	0.494425	1.36261	0.348686	1.17501	0.483791	2.02082	0.800635	1.45892	0.546091	1.42474	0.53288	1.43049	0.708001	1.50135	0.588899	1.47873	0.703613
	MUB.Sul/Cmic	0.14	0.0656506	0.14	0.0798041	0.164582	0.0830368	0.113785	0.0690307	0.149794	0.0854343	0.122016	0.0696065	0.135916	0.050198	0.145463	0.0586654	0.183702	0.101501	0.100117	0.0352182	0.127454	0.0916757	0.158411	0.107519	0.141178	0.0606943	0.139577	0.0645577	0.104455	0.0733177	0.141692	0.0374467	0.13014	0.061994
	MUB.Cel	56.4	19.4808	54.1	18.3745	65.3883	13.9996	39.5599	9.17623	63.487	17.9394	58.5224	18.7972	49.1418	21.2045	70.0222	14.0845	60.7543	12.9485	44.8987	7.8074	34.2211	7.31211	67.1586	23.257	59.8154	10.4192	55.3632	21.4312	61.6817	16.262	44.4694	14.4119	53.8143	26.3249
	MUB.Xyl	42.8	11.0449	41.1	9.41601	44.068	8.08468	32.8364	5.6563	49.0995	10.939	43.9201	9.07039	39.9876	10.2314	46.132	8.7133	42.004	7.25245	35.1328	5.92521	30.5399	4.55133	53.3469	12.9522	44.8521	6.6911	42.3028	10.8608	45.5375	7.06502	37.1996	6.67845	42.7757	12.6143
	MUB.Glu	509	96.0277	499	112.19	490.54	63.4531	428.409	100.78	519.034	72.086	569.917	111.498	511.873	120.863	518.505	55.5111	462.576	60.6684	456.989	126.849	399.829	59.4626	548.202	84.4474	489.866	44.1379	517.704	95.5656	622.13	105.138	501.438	104.082	522.308	140.584
	MUB.Nag	187	48.9178	185	54.7416	157.007	36.0892	140.19	18.0346	205.961	49.1007	219.894	51.4869	208.533	47.3649	162.623	37.6571	151.391	35.5165	145.227	20.2016	135.153	14.9045	227.735	57.5655	184.187	26.875	198.456	41.651	241.332	53.2941	202.956	39.355	214.111	55.8408
	MUB.Pho	390	98.4481	371	80.686	343.563	77.4019	334.802	56.6676	411.606	118.188	413.577	79.8358	397.953	86.4203	349.401	86.6901	337.724	71.1117	352.516	53.0821	317.088	57.1334	460.394	139.757	362.819	68.3193	398.443	89.3944	428.711	70.3944	389.498	83.7293	406.408	92.7218
	MUB.Sul	36.1	14.0211	37.5	18.2668	44.2378	15.4143	29.757	13.7393	34.0787	11.2377	36.5972	20.1318	39.4115	17.7326	41.7761	17.0095	46.6995	14.1001	26.8936	10.7507	32.6204	16.27	32.4486	10.0519	35.7088	12.6356	40.0213	14.2008	33.1732	25.0578	39.5554	14.4719	39.2677	21.3153

## Sheet: Table S2
Table S2: Statistical analysis of soil abiotic and microbial parameters. A three-way anova with fixed factors climate, land use, year and their interactions at significance level 0.05 was conducted.
		TC		TN		soil moisture		pH		P availability		K availability		Nmin		Cmic		Cmic/Corg		Cmic/Nmic
Factor	NumDF	F value	p value	F value	p value	F value	p value	F value	p value	F value	p value	F value	p value	F value	p value	F value	p value	F value	p value	F value	p value
Climate	1	2.1788	0.1782	1.0353	0.338707	2.0636	0.188783	0.9177	0.366134	0.4882	0.50451	0.0829	0.78068	0.2708	0.6169	0.5794	0.468375	0.0722	0.794982	1.4479	0.263269
Land use	4	14.0577	<0.001	3.8722	0.0112358	8.0553	<0.001	2.1963	0.0917	3.033	0.03152	19.9195	<0.001	10.0691	<0.001	5.107	0.002684	2.6932	0.048449	1.6255	0.177143
Year	1	0.4694	0.4944	12.1969	<0.001	95.2199	<0.001	7.4625	0.007111	1.6561	0.20026	0.4757	0.49151	1.7109	0.195	0.0551	0.814769	0.0579	0.810133	2.2408	0.138781
Climate:Land use	4	0.9896	0.4273	0.3252	0.858948	0.2422	0.912282	1.3808	0.262617	1.9968	0.11872	0.1751	0.94959	0.4761	0.7531	0.2005	0.936225	0.1227	0.973295	1.2388	0.302203
Climate:Year	1	0.0324	0.8575	1.8401	0.177124	5.4875	0.0205619	0.0044	0.947438	0.3473	0.55658	3.5425	0.06189	0.9656	0.3291	0.94	0.333949	0.8125	0.368939	1.0441	0.310289
Land use:Year	4	0.5463	0.702	1.1947	0.315868	4.4487	0.002049	1.885	0.116391	1.3416	0.25754	4.1998	0.00305	12.207	<0.001	4.4498	0.002046	4.7491	0.001268	4.9398	0.001415
Climate:Land use:Year	4	1.0164	0.4011	0.7771	0.541823	0.6634	0.618429	0.5237	0.718463	1.6569	0.16345	0.696	0.59595	0.9915	0.4178	0.5625	0.690261	0.4357	0.782668	0.6084	0.657896
		qCO2		µmax		MUB.Cel/Cmic		MUB.Xyl/Cmic		MUB.Glu/Cmic		MUB.Nag/Cmic		MUB.Pho/Cmic		MUB.Sul/Cmic
Factor	NumDF	F value	p value	F value	p value	F value	p value	F value	p value	F value	p value	F value	p value	F value	p value	F value	p value
Climate	1	0.9901	0.3477	15.0027	0.0044409	0.7368	0.415659	0.2531	0.62843	0.138	0.719947	0.0069	0.935851	0.2138	0.65613	0.0189	0.8908
Land use	4	0.139	0.9675	6.4096	<0.001	10.5567	<0.001	9.676	<0.001	1.4109	0.252725	3.0443	0.031078	1.8193	0.1494	1.3547	0.2515
Year	1	111.759	<0.001	0.235	0.629428	21.3902	<0.001	2.1721	0.14236	0.17	0.680766	0.2087	0.648516	4.2313	0.04154	50.9281	<0.001
Climate:Land use	4	0.4102	0.801	1.0805	0.373368	1.819	0.149447	1.7302	0.14547	0.916	0.466579	1.1984	0.330545	1.6119	0.1953	0.6988	0.5937
Climate:Year	1	1.3418	0.249	0.0592	0.808498	0.2564	0.613409	1.2397	0.26708	2.4114	0.122712	3.0638	0.0822459	0.4291	0.5135	0.009	0.9245
Land use:Year	4	1.7331	0.1471	4.0333	0.0054835	4.6716	0.001435	3.1287	0.01627	3.8512	0.005324	5.7705	<0.001	4.5619	0.00171	1.8847	0.115
Climate:Land use:Year	4	0.3665	0.8321	0.6944	0.598487	0.9222	0.452968	0.9484	0.43745	0.9463	0.439224	1.7511	0.142189	1.2361	0.29841	1.0104	0.4034
		MUB.Cel		MUB.Xyl		MUB.Glu		MUB.Nag		MUB.Pho		MUB.Sul
Factor	NumDF	F value	p value	F value	p value	F value	p value	F value	p value	F value	p value	F value	p value
Climate	1	0.148	0.7105	0.0268	0.87403	0.2218	0.650243	0.2621	0.62251	0.0993	0.760705	0.2613	0.612063
Land use	4	12.7357	<0.001	23.5639	<0.001	9.3736	<0.001	21.9613	<0.001	22.0771	<0.001	4.0053	0.007971
Year	1	83.2003	<0.001	0.1195	0.73008	8.1288	0.005016	2.1214	0.14749	2.1813	0.141946	59.3693	<0.001
Climate:Land use	4	2.0944	0.1046	2.4118	0.06945	1.5026	0.224761	3.0332	0.03151	4.3218	0.006591	0.4917	0.741777
Climate:Year	1	0.2133	0.6449	1.1732	0.28061	2.4206	0.122007	3.1007	0.08044	0.5442	0.461937	0.0431	0.835815
Land use:Year	4	0.5437	0.7039	0.6996	0.59345	0.5491	0.699968	0.9547	0.43454	1.3326	0.260826	3.4617	0.009912
Climate:Land use:Year	4	0.4049	0.8049	0.9616	0.43069	1.54	0.193912	1.3585	0.25148	1.6171	0.173286	0.375	0.826174

## Sheet: Table S3
Table S3: Differentially abundant bacterial and fungal genera between land-use types and between dry and normal years. Reported are ANCOMBC2 results including log2fold change of relative abundance, standard errors , adjusted p values (Holm-method) of Dunnett's type of test for significance of each pairwise land-use type comparison. (Land use types: CF- conventional farming;OF - organic farming; I…
Pairwise land-use differences
Bacteria	log2fold change										standard error										p value
taxon	OF - CF	IM - CF	EM- CF	EP - CF	IM - OF	EM - OF	EP - OF	EM - IM	EP - IM	EP - EM	OF - CF	IM - CF	EM- CF	EP - CF	IM - OF	EM - OF	EP - OF	EM - IM	EP - IM	EP - EM	OF - CF	IM - CF	EM- CF	EP - CF	IM - OF	EM - OF	EP - OF	EM - IM	EP - IM	EP - EM
Williamsia	-0.255868	-4.58187e-05	1.18559	2.48882	0.255822	1.44146	2.74469	1.18564	2.48887	1.30322	0.323922	0.323972	0.323992	0.324034	0.333381	0.3334	0.333441	0.333448	0.333489	0.333509	1	1	0.025644	<0.001	1	0.00158798	<0.001	0.0370993	<0.001	0.0095458
Umezawaea	-0.26564	0.862197	-0.928663	-0.560793	1.12784	-0.663023	-0.295154	-1.79086	-1.42299	0.36787	0.344628	0.344677	0.344697	0.344739	0.35367	0.353689	0.35373	0.353737	0.353778	0.353797	1	1	0.722721	1	0.149089	1	1	<0.001	0.00607589	1
Turicibacter	-0.000570236	0.0760755	0.144998	3.0004	0.0766457	0.145568	3.00097	0.0689221	2.92433	2.85541	0.173008	0.173063	0.173085	0.173132	0.18822	0.18824	0.188283	0.18829	0.188333	0.188353	1	1	1	<0.001	1	1	3.60086e-55	1	<0.001	<0.001
TM7a	0.117562	1.22282	0.30268	0.42595	1.10526	0.185118	0.308388	-0.920144	-0.796874	0.12327	0.333667	0.333716	0.333736	0.333778	0.342923	0.342942	0.342983	0.34299	0.343031	0.34305	1	0.0258995	1	1	0.129888	1	1	0.718683	1	1
Terribacillus	-0.59893	-1.14092	-0.912459	-1.28891	-0.541987	-0.313529	-0.689978	0.228457	-0.147992	-0.376449	0.249536	0.249588	0.249608	0.249652	0.261026	0.261045	0.261087	0.261095	0.261137	0.261156	1	0.000511173	0.0262808	<0.001	1	1	0.768268	1	1	1
Subgroup_10	-0.0283947	-0.274317	-0.554683	-0.457815	-0.245923	-0.526288	-0.42942	-0.280365	-0.183498	0.0968676	0.131384	0.131441	0.131464	0.131513	0.15014	0.15016	0.150203	0.15021	0.150253	0.150273	1	1	0.00260815	0.052131	1	0.0481604	0.439566	1	1	1
Sphingomonas	0.0116827	-0.073679	-0.612467	-0.717818	-0.0853617	-0.62415	-0.729501	-0.538788	-0.644139	-0.105351	0.12908	0.129137	0.12916	0.129209	0.148086	0.148106	0.148149	0.148156	0.148199	0.148219	1	1	<0.001	<0.001	1	0.00256708	<0.001	0.0280141	0.00143079	1
Sorangium	-0.107506	-1.5529	-0.809026	-1.16445	-1.4454	-0.70152	-1.05694	0.743875	0.388451	-0.355424	0.309391	0.309441	0.309461	0.309503	0.319173	0.319193	0.319234	0.319241	0.319282	0.319301	1	<0.001	0.879876	0.0175769	0.000626006	1	0.0961761	1	1	1
Solitalea	-0.245228	0.72511	0.848254	0.912146	0.970338	1.09348	1.15737	0.123144	0.187036	0.0638915	0.296738	0.296788	0.296808	0.296851	0.306827	0.306847	0.306888	0.306895	0.306936	0.306956	1	1	0.436715	0.21934	0.163328	0.0385585	0.0172796	1	1	1
Salinibacterium	-0.2167	1.18777	0.723327	1.05842	1.40447	0.940028	1.27512	-0.464442	-0.129347	0.335095	0.375817	0.375865	0.375885	0.375926	0.384314	0.384333	0.384374	0.384381	0.384421	0.38444	1	0.164676	1	0.503617	0.0274224	1	0.0957749	1	1	1
Saccharothrix	0.561305	0.148947	-0.9161	-0.75329	-0.412358	-1.47741	-1.31459	-1.06505	-0.902237	0.16281	0.349828	0.349877	0.349897	0.349938	0.358772	0.358792	0.358832	0.358839	0.35888	0.358899	1	1	0.914099	1	1	0.00407165	0.026222	0.312936	1	1
Saccharopolyspora	-1.10066	-1.29805	-1.29317	-1.18984	-0.197386	-0.192511	-0.0891796	0.00487539	0.108207	0.103331	0.282757	0.282808	0.282828	0.282871	0.293215	0.293235	0.293276	0.293283	0.293325	0.293344	0.0102554	<0.001	0.000508502	0.00271022	1	1	1	1	1	1
Roseisolibacter	0.18453	-0.730683	-0.776439	-1.2117	-0.915213	-0.960969	-1.39623	-0.0457555	-0.48102	-0.435264	0.33489	0.334939	0.334959	0.335001	0.344121	0.344141	0.344181	0.344189	0.344229	0.344249	1	1	1	0.0314146	0.809111	0.546316	0.00529673	1	1	1
Romboutsia	0.123675	0.205987	0.0442524	2.85046	0.0823122	-0.0794227	2.72679	-0.161735	2.64447	2.80621	0.266598	0.26665	0.26667	0.266713	0.277528	0.277548	0.27759	0.277597	0.277639	0.277658	1	1	1	<0.001	1	1	<0.001	1	<0.001	<0.001
Pseudoxanthomonas	-0.294571	1.17623	-0.292746	0.0505	1.4708	0.00182445	0.345071	-1.46897	-1.12573	0.343246	0.335916	0.335966	0.335985	0.336027	0.345127	0.345147	0.345187	0.345195	0.345235	0.345255	1	0.0479272	1	1	0.00215975	1	1	0.00219879	0.112687	1
Pseudomonas	-0.436949	0.426024	1.36963	1.50123	0.862974	1.80658	1.93818	0.943601	1.07521	0.131605	0.326921	0.326971	0.32699	0.327032	0.336316	0.336335	0.336376	0.336383	0.336424	0.336444	1	1	0.00290281	<0.001	0.981697	<0.001	<0.001	0.494965	0.139928	1
Pseudarthrobacter	0.0196738	-0.188718	-0.801268	-0.608176	-0.208392	-0.820942	-0.62785	-0.61255	-0.419458	0.193092	0.107008	0.107067	0.10709	0.10714	0.128816	0.128836	0.128877	0.128885	0.128926	0.128946	1	1	<0.001	<0.001	1	<0.001	<0.001	<0.001	0.11447	1
possible_genus_04	-0.313109	0.932847	0.25405	0.262588	1.24596	0.567159	0.575697	-0.678798	-0.670259	0.00853833	0.227068	0.22712	0.227141	0.227186	0.239413	0.239433	0.239475	0.239483	0.239525	0.239545	1	0.0042201	1	1	<0.001	1	1	0.46555	0.515858	1
Porphyrobacter	-0.229563	0.936288	-0.297828	0.211995	1.16585	-0.0682655	0.441558	-1.23412	-0.724293	0.509824	0.306602	0.306652	0.306672	0.306714	0.31645	0.316469	0.31651	0.316518	0.316559	0.316578	1	0.236356	1	1	0.0241879	1	1	0.0102766	1	1
Pontibacter	-0.0750357	-1.53354	-2.16425	-1.83705	-1.45851	-2.08922	-1.76202	-0.630711	-0.303513	0.327198	0.442409	0.442457	0.442476	0.442516	0.449993	0.450012	0.450052	0.450059	0.450099	0.450118	1	0.0541063	<0.001	0.00345051	0.120721	<0.001	0.0093433	1	1	1
Polycyclovorans	0.0984856	-1.83175	-1.24694	-0.603381	-1.93024	-1.34543	-0.701867	0.584812	1.22837	0.643562	0.337034	0.337084	0.337103	0.337145	0.346223	0.346243	0.346283	0.346291	0.346331	0.346351	1	<0.001	0.0223843	1	<0.001	0.0106494	1	1	0.0399321	1
Pedobacter	-0.0532278	-0.470437	-2.1664	-2.50843	-0.417209	-2.11317	-2.4552	-1.69596	-2.03799	-0.342029	0.428958	0.429006	0.429025	0.429065	0.436705	0.436724	0.436763	0.436771	0.43681	0.436829	1	1	<0.001	<0.001	1	<0.001	<0.001	0.0104651	<0.001	1
Parasegetibacter	-0.236444	1.54915	0.992014	1.14106	1.7856	1.22846	1.3775	-0.557139	-0.408097	0.149042	0.329417	0.329467	0.329487	0.329529	0.33876	0.33878	0.338821	0.338828	0.338869	0.338888	1	<0.001	0.256434	0.0537006	<0.001	0.0297519	0.0050028	1	1	1
Novosphingobium	0.740087	0.500966	1.80787	1.76723	-0.239121	1.06778	1.02714	1.3069	1.26626	-0.0406376	0.424091	0.424139	0.424158	0.424199	0.431899	0.431918	0.431958	0.431965	0.432005	0.432024	1	1	0.00215359	0.00326711	1	1	1	0.249263	0.332367	1
Noviherbaspirillum	0.106877	-1.78614	-2.68753	-2.70304	-1.89301	-2.7944	-2.80992	-0.90139	-0.916906	-0.0155153	0.376052	0.3761	0.37612	0.376161	0.384546	0.384565	0.384605	0.384612	0.384652	0.384672	1	<0.001	<0.001	<0.001	<0.001	<0.001	<0.001	1	1	1
Nonomuraea	0.106207	-0.292964	-0.30219	-0.415514	-0.399171	-0.408396	-0.521721	-0.00922541	-0.12255	-0.113324	0.0963511	0.09641	0.0964336	0.0964836	0.119833	0.119852	0.119892	0.119899	0.119939	0.119958	1	0.238553	0.176808	0.00174775	0.0894637	0.068449	0.00143817	1	1	1
Nocardia	-0.467702	-1.72712	-1.83835	-1.95261	-1.25942	-1.37065	-1.4849	-0.111228	-0.225485	-0.114257	0.331653	0.331703	0.331722	0.331764	0.34095	0.34097	0.34101	0.341018	0.341058	0.341078	1	<0.001	<0.001	<0.001	0.0221794	0.00596397	0.00137969	1	1	1
Nitrospira	-0.0353254	-0.120985	-0.563782	-0.572036	-0.0856598	-0.528456	-0.53671	-0.442796	-0.45105	-0.00825404	0.0927827	0.0928415	0.0928651	0.092915	0.11688	0.116899	0.116939	0.116946	0.116985	0.117004	1	1	<0.001	<0.001	1	0.000637637	<0.001	0.0151985	0.0115916	1
Nitrosospira	-0.46877	0.106586	-1.32942	-1.01803	0.575356	-0.860651	-0.549263	-1.43601	-1.12462	0.311387	0.211861	0.211914	0.211935	0.21198	0.224879	0.224899	0.224941	0.224949	0.224991	0.225011	1	1	<0.001	<0.001	1	0.013293	1	<0.001	<0.001	1
Nannocystis	-0.213002	-0.134185	-1.43365	-1.34654	0.0788172	-1.22065	-1.13353	-1.29947	-1.21235	0.0871145	0.381351	0.3814	0.381419	0.38146	0.389761	0.38978	0.389821	0.389828	0.389868	0.389887	1	1	0.0181728	0.0438127	1	0.179767	0.369076	0.0895644	0.191829	1
Nakamurella	-0.499385	1.64298	1.44928	1.30555	2.14237	1.94867	1.80493	-0.193697	-0.337436	-0.143739	0.278183	0.278234	0.278254	0.278297	0.28877	0.288789	0.288831	0.288838	0.28888	0.288899	1	<0.001	<0.001	<0.001	<0.001	<0.001	<0.001	1	1	1
Myxococcus	-0.29571	-1.3978	-2.18445	-1.60858	-1.10208	-1.88874	-1.31287	-0.786657	-0.210785	0.575873	0.381196	0.381245	0.381264	0.381305	0.389609	0.389628	0.389668	0.389675	0.389716	0.389735	1	0.0254384	<0.001	0.00256655	0.464631	0.000131757	0.077205	1	1	1
Methylotenera	-0.705321	-1.52125	-1.60148	-1.66335	-0.815926	-0.896158	-0.958028	-0.080232	-0.142102	-0.0618705	0.297198	0.297249	0.297269	0.297311	0.307276	0.307295	0.307337	0.307344	0.307385	0.307405	1	<0.001	<0.001	<0.001	0.732138	0.334443	0.177855	1	1	1
Massilia	-0.0853488	-0.202067	-0.900495	-0.932766	-0.116718	-0.815146	-0.847417	-0.698428	-0.730699	-0.0322711	0.251963	0.252014	0.252035	0.252079	0.263368	0.263388	0.26343	0.263437	0.263479	0.263499	1	1	0.0372163	0.0229156	1	0.203634	0.135321	0.813363	0.568345	1
Lysinibacillus	0.135368	-0.361092	-0.784447	2.54953	-0.49646	-0.919815	2.41417	-0.423355	2.91063	3.33398	0.456353	0.4564	0.456419	0.45646	0.463779	0.463798	0.463837	0.463844	0.463884	0.463903	1	1	1	<0.001	1	1	<0.001	1	<0.001	<0.001
Luteolibacter	-0.290185	2.017	1.00809	1.47593	2.30719	1.29828	1.76611	-1.00891	-0.541073	0.467834	0.287949	0.287999	0.288019	0.288062	0.298266	0.298285	0.298327	0.298334	0.298375	0.298395	1	<0.001	0.0420508	<0.001	<0.001	0.00129782	<0.001	0.0643873	1	1
Luteimonas	-1.02815	-0.0362684	-1.4098	-2.00129	0.991883	-0.381653	-0.973142	-1.37354	-1.96502	-0.591489	0.467473	0.46752	0.467539	0.467579	0.474779	0.474798	0.474837	0.474844	0.474884	0.474903	1	1	0.267988	0.00198773	1	1	1	0.395102	0.0036946	1
Legionella	-0.267427	0.734923	0.48278	0.540996	1.00235	0.750207	0.808423	-0.252143	-0.193927	0.0582159	0.172719	0.172774	0.172796	0.172843	0.18795	0.18797	0.188013	0.188021	0.188063	0.188084	1	0.00219574	0.507236	0.175529	<0.001	0.00680124	0.00180183	1	1	1
Lechevalieria	-1.11624	0.470699	-2.76359	-2.38814	1.58694	-1.64734	-1.2719	-3.23429	-2.85884	0.375444	0.359555	0.359603	0.359623	0.359665	0.368325	0.368344	0.368384	0.368391	0.368432	0.368451	0.176127	1	<0.001	<0.001	0.00165011	0.000792482	0.0518542	<0.001	<0.001	1
Lapillicoccus	0.756011	1.38747	1.38136	0.906349	0.631459	0.625349	0.150338	-0.00611044	-0.481121	-0.475011	0.38072	0.380769	0.380788	0.380829	0.38914	0.389159	0.3892	0.389207	0.389247	0.389266	1	0.0285795	0.0301513	1	1	1	1	1	1	1
JGI_0001001-H03	-0.409199	-0.634813	-0.930324	-1.39636	-0.225614	-0.521125	-0.987162	-0.295511	-0.761548	-0.466037	0.354016	0.354065	0.354084	0.354126	0.362884	0.362903	0.362944	0.362951	0.362992	0.363011	1	1	0.898341	0.00855855	1	1	0.688408	1	1	1
Jatrophihabitans	-0.774022	0.656956	0.215105	-0.10753	1.43098	0.989127	0.666492	-0.441852	-0.764486	-0.322635	0.254211	0.254262	0.254283	0.254326	0.26554	0.26556	0.265601	0.265609	0.265651	0.26567	0.243101	0.981273	1	1	<0.001	0.0206139	1	1	0.41013	1
Hyphomicrobium	-0.0940738	-0.479513	-0.395532	-0.376383	-0.385439	-0.301458	-0.282309	0.0839806	0.10313	0.0191495	0.103308	0.103367	0.10339	0.10344	0.12567	0.12569	0.125731	0.125738	0.125779	0.125798	1	<0.001	0.0137505	0.0283428	0.210574	1	1	1	1	1
Hymenobacter	1.2622	-0.74602	-0.631284	-0.635488	-2.00822	-1.89349	-1.89769	0.114737	0.110533	-0.00420401	0.238593	0.238645	0.238666	0.23871	0.25048	0.2505	0.250542	0.25055	0.250592	0.250612	<0.001	0.174346	0.779301	0.74851	<0.001	<0.001	<0.001	1	1	1
Hirschia	-0.299368	-0.989876	-1.07459	-1.10321	-0.690507	-0.77522	-0.803842	-0.0847126	-0.113334	-0.0286217	0.211112	0.211165	0.211186	0.211231	0.224165	0.224185	0.224227	0.224235	0.224277	0.224297	1	<0.001	<0.001	<0.001	0.184862	0.0497558	0.0318313	1	1	1
Glycomyces	-0.58332	0.000404463	-2.04155	-2.10244	0.583724	-1.45823	-1.51912	-2.04195	-2.10284	-0.0608895	0.248494	0.248545	0.248566	0.24861	0.26002	0.260039	0.260081	0.260089	0.260131	0.26015	1	1	<0.001	<0.001	1	<0.001	<0.001	<0.001	<0.001	1
Flavobacterium	-0.174658	1.15175	1.19875	1.15307	1.32641	1.37341	1.32772	0.0470007	0.00131507	-0.0456856	0.198802	0.198856	0.198877	0.198923	0.212472	0.212492	0.212534	0.212542	0.212585	0.212605	1	<0.001	<0.001	<0.001	<0.001	<0.001	<0.001	1	1	1
Flavisolibacter	-0.888237	-0.19075	-0.892155	-1.42846	0.697488	-0.00391786	-0.540224	-0.701406	-1.23771	-0.536306	0.316089	0.316138	0.316158	0.316201	0.325718	0.325738	0.325779	0.325786	0.325827	0.325846	0.497317	1	0.484198	0.000665614	1	1	1	1	0.0153342	1
FFCH7168	-0.183821	-0.899789	-0.924303	-1.18907	-0.715968	-0.740482	-1.00525	-0.0245139	-0.289283	-0.264769	0.234484	0.234536	0.234557	0.234601	0.24653	0.24655	0.246592	0.2466	0.246642	0.246661	1	0.0129079	0.00848537	<0.001	0.373414	0.273444	0.00481772	1	1	1
Edaphobaculum	-0.169026	1.72203	1.81625	1.43401	1.89106	1.98528	1.60304	0.0942195	-0.288019	-0.382238	0.392574	0.392623	0.392642	0.392683	0.400814	0.400833	0.400873	0.40088	0.400921	0.40094	1	0.00119407	<0.001	0.0251029	<0.001	<0.001	0.0064544	1	1	1
Domibacillus	-0.196947	-0.308622	-0.665777	1.17073	-0.111675	-0.46883	1.36767	-0.357154	1.47935	1.8365	0.404231	0.404279	0.404298	0.404339	0.412303	0.412322	0.412362	0.412369	0.412409	0.412428	1	1	1	0.391585	1	1	0.0951125	1	0.0352487	0.000901489
Dinghuibacter	-0.229819	0.241655	0.997627	0.670495	0.471473	1.22745	0.900314	0.755972	0.428841	-0.327132	0.338948	0.338998	0.339017	0.339059	0.3481	0.348119	0.348159	0.348167	0.348207	0.348227	1	1	0.342969	1	1	0.0449041	1	1	1	1
Devosia	-1.84849	1.19634	-1.49317	-1.63023	3.04483	0.355318	0.218259	-2.68951	-2.82657	-0.137059	0.487526	0.487573	0.487592	0.487632	0.49463	0.494649	0.494688	0.494695	0.494735	0.494753	0.0154811	1	0.216135	0.083175	<0.001	1	1	<0.001	<0.001	1
Chungangia	0.154359	0.0489433	-0.0672619	1.31282	-0.105416	-0.221621	1.15846	-0.116205	1.26388	1.38009	0.146968	0.147024	0.147047	0.147094	0.164201	0.164221	0.164264	0.164272	0.164314	0.164335	1	1	1	<0.001	1	1	<0.001	1	<0.001	<0.001
Cellulomonas	-0.509199	1.0526	0.553764	0.616293	1.5618	1.06296	1.12549	-0.498833	-0.436303	0.0625297	0.213044	0.213097	0.213118	0.213163	0.226006	0.226026	0.226069	0.226076	0.226119	0.226139	1	<0.001	0.874922	0.377701	<0.001	<0.001	<0.001	1	1	1
BIyi10	-0.410145	0.798855	-0.728878	-0.598538	1.209	-0.318733	-0.188393	-1.52773	-1.39739	0.130339	0.391095	0.391143	0.391163	0.391204	0.399356	0.399375	0.399416	0.399423	0.399463	0.399482	1	1	1	1	0.257574	1	1	0.0139241	0.0493796	1
Aurantisolimonas	-0.061243	1.58449	1.1743	0.375657	1.64573	1.23554	0.4369	-0.410188	-1.20883	-0.798644	0.408194	0.408242	0.408262	0.408302	0.416212	0.416231	0.416271	0.416278	0.416318	0.416337	1	0.0109547	0.399946	1	0.00817591	0.303572	1	1	0.370389	1
Anaeromyxobacter	0.515922	0.0646296	-0.815131	-1.45355	-0.451292	-1.33105	-1.96948	-0.87976	-1.51818	-0.638423	0.434829	0.434877	0.434896	0.434937	0.442504	0.442523	0.442563	0.44257	0.44261	0.442629	1	1	1	0.0868507	1	0.272061	0.000913089	1	0.063608	1
Aggregicoccus	-0.320473	-1.31808	-1.46902	-1.22235	-0.997607	-1.14855	-0.901874	-0.150943	0.0957336	0.246676	0.355526	0.355575	0.355594	0.355636	0.364367	0.364386	0.364427	0.364434	0.364475	0.364494	1	0.0221166	0.00384054	0.061398	0.633207	0.167682	1	1	1	1
Aeromicrobium	-0.108239	-0.246293	-1.2366	-1.39041	-0.138054	-1.12836	-1.28217	-0.99031	-1.14411	-0.153802	0.269081	0.269132	0.269152	0.269196	0.279935	0.279954	0.279996	0.280003	0.280045	0.280065	1	1	<0.001	<0.001	1	0.00569941	<0.001	0.0410755	0.00454907	1
Actinophytocola	0.702943	1.71869	0.14082	0.158677	1.01575	-0.562122	-0.544266	-1.57787	-1.56002	0.0178564	0.412187	0.412235	0.412255	0.412296	0.420151	0.42017	0.42021	0.420217	0.420257	0.420276	1	0.0032527	1	1	1	1	1	0.0182798	0.0214657	1
Actinomycetospora	-0.557054	0.900932	1.12538	0.919848	1.45799	1.68243	1.4769	0.224446	0.0189155	-0.20553	0.18313	0.183184	0.183206	0.183252	0.19769	0.19771	0.197753	0.197761	0.197803	0.197824	0.219635	<0.001	<0.001	<0.001	<0.001	<0.001	<0.001	1	1	1
Fungi	log2fold change										standard error										p value
taxon	OF - CF	IM - CF	EM- CF	EP - CF	IM - OF	EM - OF	EP - OF	EM - IM	EP - IM	EP - EM	OF - CF	IM - CF	EM- CF	EP - CF	IM - OF	EM - OF	EP - OF	EM - IM	EP - IM	EP - EM	OF - CF	IM - CF	EM- CF	EP - CF	IM - OF	EM - OF	EP - OF	EM - IM	EP - IM	EP - EM
Vishniacozyma	-0.187268	2.21372	0.726005	-0.231635	2.40099	0.913272	-0.0443672	-1.48772	-2.44536	-0.95764	0.459981	0.465359	0.468437	0.470724	0.523677	0.526414	0.528451	0.53112	0.533139	0.535828	1	<0.001	1	1	<0.001	1	1	0.34409	0.000335728	1
Unguiculariopsis	0.728016	-2.6659	-2.23219	-2.31009	-3.39392	-2.96021	-3.03811	0.433713	0.355809	-0.0779043	0.422787	0.428237	0.431355	0.433672	0.489649	0.492379	0.49441	0.497067	0.499079	0.501757	1	<0.001	<0.001	<0.001	<0.001	<0.001	<0.001	1	1	1
Truncatella	0.666595	-2.0136	0.50216	0.3876	-2.6802	-0.164435	-0.278995	2.51576	2.4012	-0.11456	0.406577	0.412059	0.415196	0.417526	0.474953	0.477676	0.479703	0.482351	0.484358	0.487029	1	<0.001	1	1	<0.001	1	1	<0.001	<0.001	1
Tricellula	-0.156484	4.44736	-0.0543589	-0.297351	4.60384	0.102125	-0.140868	-4.50172	-4.74471	-0.242992	0.492481	0.497799	0.500843	0.503105	0.553717	0.556456	0.558492	0.561167	0.563187	0.56588	1	<0.001	1	1	<0.001	1	1	<0.001	<0.001	1
Stachybotrys	-0.186762	-0.864142	-0.896575	-1.12574	-0.67738	-0.709812	-0.938975	-0.0324325	-0.261595	-0.229163	0.260809	0.266363	0.26954	0.2719	0.347423	0.349865	0.351686	0.354024	0.355825	0.358209	1	0.0889858	0.0673754	0.0026907	1	1	0.565686	1	1	1
Sporormiella	-0.0655972	-0.106058	0.193673	3.03863	-0.0404606	0.25927	3.10423	0.299731	3.14469	2.84496	0.462179	0.467553	0.470628	0.472914	0.5257	0.528437	0.530474	0.533144	0.535162	0.537852	1	1	1	<0.001	1	1	<0.001	1	<0.001	<0.001
Shiraia	-0.108583	-0.100002	3.02834	2.3474	0.00858084	3.13692	2.45598	3.12834	2.4474	-0.68094	0.406013	0.411496	0.414633	0.416964	0.474442	0.477166	0.479193	0.48184	0.483847	0.486518	1	1	<0.001	<0.001	1	<0.001	<0.001	<0.001	<0.001	1
Serendipita	1.08175	-0.20973	3.63684	2.19546	-1.29148	2.55508	1.11371	3.84657	2.40519	-1.44138	0.610785	0.615912	0.618848	0.62103	0.664909	0.667629	0.669652	0.672323	0.674332	0.677014	1	1	<0.001	0.0299746	1	0.00979743	1	<0.001	0.0269464	1
Septoriella	0.106399	0.366453	3.06286	3.1018	0.260053	2.95647	2.9954	2.69641	2.73534	0.0389313	0.502194	0.507495	0.510529	0.512784	0.562744	0.565482	0.567518	0.570194	0.572214	0.574907	1	1	<0.001	<0.001	1	<0.001	<0.001	<0.001	<0.001	1
Septoria	0.307109	-0.183701	2.05107	0.953393	-0.490811	1.74396	0.646284	2.23477	1.13709	-1.09768	0.474303	0.479654	0.482717	0.484993	0.536882	0.53962	0.541657	0.54433	0.546349	0.54904	1	1	0.00157943	1	1	0.0830998	1	0.00288645	1	1
Sclerostagonospora	-2.0872	-1.31228	1.16409	0.869193	0.774924	3.25129	2.95639	2.47636	2.18147	-0.294893	0.500611	0.505914	0.50895	0.511206	0.561271	0.564009	0.566046	0.568721	0.570741	0.573434	0.00227807	0.679129	1	1	1	<0.001	<0.001	0.00100886	0.0097309	1
Schizothecium	-0.309451	-0.703379	-1.68345	-1.97205	-0.393927	-1.374	-1.6626	-0.980074	-1.26868	-0.288602	0.450138	0.455535	0.458624	0.460919	0.514634	0.51737	0.519405	0.522072	0.524089	0.526776	1	1	0.0185221	0.00145919	1	0.590031	0.103491	1	1	1
Sarocladium	0.0136742	2.93656	0.0380108	0.5196	2.92288	0.0243367	0.505926	-2.89854	-2.41696	0.481589	0.632683	0.63778	0.640698	0.642867	0.685739	0.688454	0.690473	0.69314	0.695146	0.697824	1	<0.001	1	1	0.00140692	1	1	0.00198322	0.0327478	1
Rhizopus	-0.292573	-2.43734	-2.62894	-3.04624	-2.14477	-2.33637	-2.75367	-0.191599	-0.608897	-0.417298	0.468258	0.47362	0.476689	0.47897	0.531302	0.53404	0.536077	0.538748	0.540767	0.543457	1	<0.001	<0.001	<0.001	0.00393142	0.000893693	<0.001	1	1	1
Rhizophlyctis	-1.15072	-1.07285	-1.96823	-2.50282	0.0778759	-0.817507	-1.35209	-0.895382	-1.42997	-0.534587	0.624564	0.629671	0.632596	0.63477	0.678008	0.680725	0.682746	0.685414	0.687421	0.690101	1	1	0.142581	0.00624458	1	1	1	1	1	1
Rhizophagus	0.263365	0.467547	2.4107	2.29214	0.204182	2.14734	2.02877	1.94316	1.82459	-0.118566	0.477854	0.483198	0.486257	0.48853	0.540164	0.542903	0.54494	0.547613	0.549632	0.552323	1	1	<0.001	<0.001	1	0.00577596	0.0144858	0.0281216	0.0626936	1
Rhexocercosporidium	-0.366713	6.00439	1.82809	2.36288	6.3711	2.1948	2.7296	-4.1763	-3.6415	0.534798	0.613616	0.618739	0.621673	0.623853	0.667598	0.670318	0.67234	0.67501	0.677019	0.679701	1	<0.001	0.218045	0.0104303	<0.001	0.0715722	0.00341585	<0.001	<0.001	1
Ramicandelaber	2.68682	0.25121	3.17907	2.15837	-2.43561	0.492252	-0.528451	2.92786	1.90716	-1.0207	0.639276	0.644363	0.647277	0.649442	0.692022	0.694735	0.696753	0.69942	0.701424	0.704101	0.00199106	1	<0.001	0.0627435	0.0317982	1	1	0.00211568	0.435864	1
Pyrenochaetopsis	0.99733	1.63647	0.716443	0.721319	0.639139	-0.280887	-0.276011	-0.920026	-0.915149	0.00487673	0.274593	0.280198	0.283403	0.285784	0.359119	0.361626	0.363494	0.365899	0.367746	0.370195	0.0215291	<0.001	0.832381	0.832381	1	1	1	0.841278	0.892266	1
Pyrenochaeta	1.27055	0.976416	3.70045	3.76505	-0.29413	2.4299	2.4945	2.72403	2.78863	0.0646022	0.658824	0.663886	0.666784	0.668939	0.710684	0.713393	0.715407	0.71807	0.720071	0.722745	1	1	<0.001	<0.001	1	0.0478125	0.0359549	0.0110731	0.00813243	1
Pseudopithomyces	0.0118827	2.00822	2.29584	0.924617	1.99634	2.28396	0.912735	0.287617	-1.0836	-1.37122	0.521192	0.526459	0.529475	0.531716	0.58046	0.583196	0.585231	0.587908	0.589927	0.59262	1	0.0103077	0.00112506	1	0.0423289	0.00688498	1	1	1	1
Pseudogymnoascus	0.607819	-1.39484	-1.47045	-2.04799	-2.00266	-2.07826	-2.65581	-0.0756087	-0.653156	-0.577547	0.321886	0.327509	0.330724	0.333112	0.399768	0.402406	0.404371	0.406918	0.408861	0.411441	1	0.00149047	0.00064313	<0.001	<0.001	<0.001	<0.001	1	1	1
Preussia	-0.708851	-0.895113	-0.378428	3.4459	-0.186262	0.330423	4.15475	0.516685	4.34102	3.82433	0.52985	0.535103	0.53811	0.540345	0.588558	0.591294	0.593328	0.596005	0.598023	0.600716	1	1	1	<0.001	1	1	<0.001	1	<0.001	<0.001
Powellomyces	-0.0159753	-1.68326	-1.90568	-2.75449	-1.66729	-1.8897	-2.73851	-0.222414	-1.07122	-0.848811	0.617461	0.622578	0.625508	0.627686	0.671252	0.67397	0.675992	0.678662	0.68067	0.683351	1	0.504427	0.174879	0.000885982	0.930085	0.376524	0.00390288	1	1	1
Plectosphaerella	1.72631	1.42794	-1.7973	-0.987772	-0.298366	-3.5236	-2.71408	-3.22524	-2.41571	0.809524	0.671699	0.676745	0.679634	0.681782	0.723001	0.725706	0.727718	0.730378	0.732377	0.735048	0.737804	1	0.601805	1	1	<0.001	0.0144927	0.000770334	0.0724873	1
Penicillium	-1.26231	1.59235	2.5401	1.60887	2.85466	3.8024	2.87118	0.947745	0.0165215	-0.931223	0.637481	0.642571	0.645486	0.647652	0.690311	0.693025	0.695043	0.697709	0.699714	0.702392	1	0.945219	0.00619879	0.94225	0.00271373	<0.001	0.00272989	1	1	1
Paraphoma	2.36337	0.554052	3.04883	2.47657	-1.80931	0.685461	0.113202	2.49477	1.92252	-0.572259	0.491146	0.496467	0.499512	0.501775	0.552478	0.555217	0.557253	0.559928	0.561948	0.564641	0.000112944	1	<0.001	<0.001	0.0756381	1	1	0.000623987	0.0458683	1
Paraphaeosphaeria	0.228708	0.715104	3.08827	3.96062	0.486396	2.85957	3.73191	2.37317	3.24552	0.872348	0.523839	0.529102	0.532115	0.534354	0.582934	0.58567	0.587705	0.590382	0.592401	0.595093	1	1	<0.001	<0.001	1	<0.001	<0.001	0.00405316	<0.001	1
Operculomyces	0.103013	2.00476	2.71206	2.93977	1.90175	2.60905	2.83676	0.707303	0.935015	0.227711	0.554248	0.559461	0.562445	0.564663	0.611457	0.614189	0.616221	0.618897	0.620913	0.623603	1	0.0249504	<0.001	<0.001	0.133797	0.00160849	<0.001	1	1	1
Oidiodendron	0.824408	-1.71831	-1.37475	-2.04262	-2.54272	-2.19915	-2.86703	0.343567	-0.324308	-0.667874	0.372018	0.377566	0.38074	0.383097	0.443926	0.446628	0.44864	0.45126	0.45325	0.455898	1	<0.001	0.0221559	<0.001	<0.001	<0.001	<0.001	1	1	1
Neosetophoma	-0.67396	2.91306	-0.473918	-0.611281	3.58702	0.200042	0.0626797	-3.38698	-3.52434	-0.137363	0.471593	0.476949	0.480015	0.482293	0.53438	0.537118	0.539155	0.541827	0.543846	0.546536	1	<0.001	1	1	<0.001	1	1	<0.001	<0.001	1
Neopyrenochaeta	1.20191	0.40176	2.22151	2.29343	-0.800149	1.0196	1.09152	1.81975	1.89167	0.0719209	0.589677	0.594835	0.597788	0.599983	0.644894	0.647619	0.649646	0.652319	0.654331	0.657017	1	1	0.0154825	0.0102463	1	1	1	0.393399	0.290163	1
Neoascochyta	-0.437932	1.73865	-1.09797	0.310317	2.17658	-0.660039	0.748249	-2.83662	-1.42833	1.40829	0.55041	0.555628	0.558616	0.560837	0.607847	0.61058	0.612612	0.615288	0.617305	0.619995	1	0.116685	1	1	0.0238271	1	1	<0.001	1	1
Myrmecridium	-2.15259	0.610192	-1.83902	-1.51984	2.76278	0.313569	0.63275	-2.44921	-2.13003	0.319181	0.542842	0.548073	0.551067	0.553293	0.600738	0.603471	0.605504	0.608181	0.610198	0.61289	0.00553637	1	0.0622532	0.43654	<0.001	1	1	0.00432309	0.0359173	1
Monographella	-0.94213	-1.83968	-1.82592	-1.80433	-0.897546	-0.883792	-0.862205	0.0137542	0.0353414	0.0215871	0.407654	0.413134	0.41627	0.418599	0.475927	0.478651	0.480678	0.483326	0.485334	0.488006	1	0.000656853	0.000882333	0.00123125	1	1	1	1	1	1
Microascus	-3.42803	-5.0695	-5.71245	-5.21663	-1.64147	-2.28443	-1.7886	-0.642957	-0.147135	0.495823	0.765253	0.770193	0.773022	0.775124	0.812996	0.815677	0.81767	0.820313	0.822295	0.824945	0.000535166	<0.001	<0.001	<0.001	1	0.298658	1	1	1	1
Magnaporthiopsis	1.62407	-0.0944906	-0.14814	-0.109108	-1.71856	-1.77221	-1.73318	-0.0536494	-0.0146176	0.0390319	0.468178	0.47354	0.47661	0.47889	0.531228	0.533966	0.536003	0.538674	0.540693	0.543383	0.0373943	1	1	1	0.083378	0.0637544	0.083378	1	1	1
Leucosporidium	-0.0585978	1.31493	-0.61028	-1.15856	1.37353	-0.551682	-1.09996	-1.92521	-2.47349	-0.548278	0.580657	0.585828	0.588789	0.59099	0.636362	0.639089	0.641117	0.643791	0.645804	0.648491	1	1	1	1	1	1	1	0.196573	0.00942279	1
Kiflimonium	-3.00669	-2.58109	-2.80598	-2.4865	0.425598	0.200711	0.520189	-0.224887	0.0945912	0.319478	0.546666	0.551891	0.554882	0.557105	0.604329	0.607062	0.609095	0.611771	0.613788	0.616479	<0.001	<0.001	<0.001	0.00060191	1	1	1	1	1	1
Keissleriella	-0.352555	4.72728	0.623918	1.00853	5.07984	0.976473	1.36109	-4.10337	-3.71875	0.384613	0.478452	0.483795	0.486854	0.489126	0.540718	0.543456	0.545493	0.548166	0.550185	0.552877	1	<0.001	1	1	<0.001	1	0.875802	<0.001	<0.001	1
Gremmenia	0.362085	3.43293	1.42421	1.81333	3.07085	1.06212	1.45124	-2.00873	-1.61961	0.389123	0.698841	0.703854	0.706724	0.708858	0.749024	0.751722	0.753729	0.756384	0.758379	0.761044	1	<0.001	1	0.763678	0.00316584	1	1	0.582195	1	1
Gongronella	-0.05444	3.70427	1.89257	1.16207	3.75871	1.94701	1.21651	-1.8117	-2.5422	-0.730507	0.611685	0.616811	0.619746	0.621927	0.665764	0.668484	0.670507	0.673177	0.675186	0.677868	1	<0.001	0.168484	1	<0.001	0.256512	1	0.502268	0.0125751	1
Gallinipes	2.0478	0.0649029	-0.0346745	-0.11218	-1.9829	-2.08248	-2.15998	-0.0995775	-0.177083	-0.0775059	0.390645	0.396157	0.399311	0.401654	0.460594	0.46331	0.465331	0.467967	0.469968	0.47263	<0.001	1	1	1	0.00124455	0.000526209	<0.001	1	1	1
Funneliformis	2.59408	1.00508	-0.764429	-0.740925	-1.589	-3.35851	-3.33501	-1.76951	-1.746	0.0235031	0.598235	0.60338	0.606326	0.608515	0.653001	0.655724	0.657749	0.660421	0.662432	0.665116	0.00109524	1	1	1	1	<0.001	<0.001	0.535226	0.59237	1
Filobasidium	0.561146	0.277427	-0.962526	-1.55589	-0.283719	-1.52367	-2.11703	-1.23995	-1.83331	-0.59336	0.488558	0.493883	0.496931	0.499196	0.550078	0.552816	0.554853	0.557527	0.559547	0.562239	1	1	1	0.134497	1	0.418465	0.0105417	1	0.0783865	1
Eucasphaeria	-1.53962	-1.79481	-2.33447	-2.97643	-0.255193	-0.79485	-1.43681	-0.539657	-1.18162	-0.641959	0.583914	0.58908	0.592038	0.594237	0.639441	0.642167	0.644195	0.646869	0.648881	0.651568	0.615783	0.174761	0.00615799	<0.001	1	1	1	1	1	1
Dominikia	1.77879	1.93032	4.82949	5.10408	0.151527	3.0507	3.32528	2.89917	3.17376	0.274583	0.57706	0.582237	0.585201	0.587404	0.632963	0.635691	0.637719	0.640393	0.642407	0.645095	0.130468	0.0600065	<0.001	<0.001	1	<0.001	<0.001	<0.001	<0.001	1
Diversispora	0.115141	0.20896	2.67369	2.53805	0.0938182	2.55854	2.42291	2.46473	2.32909	-0.135634	0.565552	0.570746	0.57372	0.575931	0.622102	0.624832	0.626862	0.629538	0.631553	0.634242	1	1	<0.001	0.000802936	1	0.00319312	0.0081672	0.00673682	0.0164081	1
Dioszegia	0.808625	1.50051	1.20791	-0.484393	0.691888	0.39928	-1.29302	-0.292608	-1.98491	-1.6923	0.453064	0.458455	0.461541	0.463834	0.517319	0.520056	0.522091	0.524759	0.526777	0.529464	1	0.0708354	0.563638	1	1	1	0.803256	1	0.0116105	0.0912793
Didymocyrtis	-0.0131061	4.01698	0.578902	0.743077	4.03009	0.592008	0.756183	-3.43808	-3.27391	0.164174	0.40692	0.412401	0.415537	0.417867	0.475262	0.477986	0.480013	0.482661	0.484668	0.48734	1	<0.001	1	1	<0.001	1	1	<0.001	<0.001	1
Dendryphion	1.50329	-0.100111	-0.607738	-1.57802	-1.6034	-2.11103	-3.08131	-0.507626	-1.47791	-0.970282	0.483348	0.488683	0.491736	0.494005	0.545249	0.547988	0.550025	0.552698	0.554718	0.55741	0.139417	1	1	0.1059	0.240906	0.00895751	<0.001	1	0.55988	1
Cystofilobasidium	0.454533	-0.274885	-3.23542	-3.83615	-0.729417	-3.68995	-4.29068	-2.96053	-3.56127	-0.600733	0.461604	0.466979	0.470055	0.472341	0.525171	0.527908	0.529944	0.532614	0.534633	0.537322	1	1	<0.001	<0.001	1	<0.001	<0.001	<0.001	<0.001	1
Cyphellophora	0.29258	1.78208	2.65779	2.7661	1.4895	2.36521	2.47352	0.875708	0.984017	0.108309	0.700051	0.705062	0.707932	0.710065	0.750186	0.752884	0.75489	0.757545	0.759539	0.762204	1	0.844923	0.0133082	0.00759889	1	0.125311	0.0793703	1	1	1
Cryptococcus	0.831402	1.67776	-0.715459	-1.04089	0.846355	-1.54686	-1.87229	-2.39322	-2.71865	-0.325433	0.492171	0.497489	0.500534	0.502796	0.553429	0.556168	0.558204	0.560879	0.562899	0.565592	1	0.0518255	1	1	1	0.344146	0.0545835	0.00149769	<0.001	1
Clonostachys	1.87319	3.35145	2.21192	1.81774	1.47826	0.338732	-0.0554402	-1.13953	-1.5337	-0.394172	0.415925	0.421388	0.424515	0.426837	0.483417	0.486145	0.488174	0.490827	0.492838	0.495513	<0.001	<0.001	<0.001	0.00138958	0.126054	1	1	1	0.106969	1
Claroideoglomus	3.3277	1.96081	5.18924	5.37043	-1.36689	1.86154	2.04273	3.22843	3.40962	0.181191	0.591915	0.597069	0.600021	0.602214	0.647013	0.649738	0.651764	0.654437	0.656448	0.659134	<0.001	0.066063	<0.001	<0.001	1	0.25666	0.109544	<0.001	<0.001	1
Cladosporium	-0.330215	0.221635	-0.35503	-1.17142	0.55185	-0.0248147	-0.841205	-0.576665	-1.39306	-0.81639	0.310368	0.315999	0.319219	0.321611	0.389778	0.392394	0.394341	0.396862	0.398788	0.401345	1	1	1	0.0209537	1	1	1	1	0.0365376	1
Cladorrhinum	-4.6466	-4.47195	-4.70973	-5.05043	0.174651	-0.0631365	-0.403829	-0.237788	-0.57848	-0.340692	0.564334	0.56953	0.572505	0.574716	0.620954	0.623684	0.625714	0.62839	0.630405	0.633094	<0.001	<0.001	<0.001	<0.001	1	1	1	1	1	1
Chaetomium	-0.243289	-1.47589	-2.56054	-1.81157	-1.2326	-2.31725	-1.56829	-1.08465	-0.335683	0.748964	0.497286	0.502596	0.505635	0.507893	0.55818	0.560918	0.562955	0.56563	0.56765	0.570343	1	0.240828	<0.001	0.0269396	1	0.00276323	0.376754	1	1	1
Chaetasbolisia	0.0450514	0.326877	3.84691	3.72459	0.281825	3.80185	3.67954	3.52003	3.39771	-0.122318	0.453388	0.458779	0.461864	0.464156	0.517617	0.520353	0.522389	0.525057	0.527074	0.529762	1	1	<0.001	<0.001	1	<0.001	<0.001	<0.001	<0.001	1
Ceratobasidium	-0.573132	2.71125	3.08431	3.07254	3.28438	3.65744	3.64567	0.373061	0.361287	-0.0117734	0.730532	0.735509	0.738359	0.740477	0.779502	0.782192	0.784192	0.786842	0.78883	0.791488	1	0.0165154	0.00219995	0.00245214	0.00190047	<0.001	<0.001	1	1	1
Beauveria	-0.471137	2.08736	2.27875	4.01235	2.55849	2.74989	4.48349	0.191397	1.925	1.7336	0.679995	0.685031	0.687914	0.690058	0.730947	0.73365	0.73566	0.738319	0.740317	0.742986	1	0.16304	0.0670818	<0.001	0.0341935	0.0132783	<0.001	1	0.63872	1
Ascobolus	0.341466	3.09038	1.41448	1.26117	2.74891	1.07302	0.919703	-1.67589	-1.82921	-0.153314	0.625137	0.630244	0.633168	0.635341	0.678553	0.68127	0.683291	0.685959	0.687966	0.690646	1	<0.001	1	1	0.00390232	1	1	1	0.568915	1
Arachnomyces	-0.878986	-5.0205	-4.96142	-5.19193	-4.14151	-4.08243	-4.31294	0.0590784	-0.171432	-0.23051	0.549961	0.55518	0.558168	0.560389	0.607425	0.610158	0.61219	0.614866	0.616883	0.619573	1	<0.001	<0.001	<0.001	<0.001	<0.001	<0.001	1	1	1
Apodus	-0.444111	-4.43539	-3.89072	-4.36452	-3.99128	-3.44661	-3.92041	0.544672	0.0708661	-0.473806	0.675981	0.681021	0.683907	0.686053	0.727101	0.729805	0.731816	0.734476	0.736474	0.739144	1	<0.001	<0.001	<0.001	<0.001	<0.001	<0.001	1	1	1
Alternaria	0.428808	-0.351943	-1.96007	-2.96007	-0.780751	-2.38888	-3.38887	-1.60813	-2.60812	-0.999995	0.429658	0.435094	0.438205	0.440517	0.495904	0.498636	0.500669	0.503328	0.505342	0.508023	1	1	0.000559784	<0.001	1	<0.001	<0.001	0.0958723	<0.001	1
dry vs normal year differences
Bacteria	log2fold change					standard error					p value
taxon	CF	OF	IM	EM	EP	CF	OF	IM	EM	EP	CF	OF	IM	EM	EP
Order:Saccharimonadales	-0.96802	-1.77277	0.180251	-0.392362	0.00198305	0.333907	0.34281	0.342908	0.342959	0.343032	1	<0.001	1	1	1
Order:Rhodospirillales	-0.7856	-1.21249	-0.253161	-0.404133	-0.170825	0.28662	0.296578	0.296677	0.29673	0.296803	0.621677	0.00462744	1	1	1
Order:Lineage_IV	-1.32119	-1.38087	-0.755609	-0.763545	-0.735659	0.300991	0.310595	0.310694	0.310746	0.310819	0.00117562	0.000914486	1	1	1
Genus:Tychonema_CCAP_1459-11B	-0.937565	-1.03247	0.156954	-0.167433	-0.0475895	0.281883	0.291966	0.292065	0.292118	0.292191	0.0946567	0.0448294	1	1	1
Genus:Roseimicrobium	-0.556314	-0.843439	0.0679366	0.0528091	-0.0467591	0.178435	0.192715	0.192818	0.192872	0.192947	0.194031	0.00134361	1	1	1
Genus:Rhizobacter	-2.02498	-0.263346	0.407253	0.190118	0.588448	0.519642	0.526209	0.526303	0.526353	0.526422	0.0106666	1	1	1	1
Genus:Promicromonospora	-1.36908	-0.367364	0.667584	-0.121249	0.490247	0.383908	0.391967	0.392064	0.392114	0.392186	0.0363947	1	1	1	1
Genus:Methylotenera	-0.414259	-1.70543	-0.177957	-0.344169	-0.273896	0.297615	0.3073	0.307398	0.30745	0.307523	1	<0.001	1	1	1
Genus:Methylobacterium-Methylorubrum	-0.520338	-1.17687	-0.0788434	0.103149	0.0209084	0.223942	0.235938	0.236039	0.236092	0.236167	1	<0.001	1	1	1
Genus:Luteolibacter	-1.1157	-1.77538	0.0632604	-0.156738	0.176479	0.282453	0.29252	0.29262	0.292672	0.292745	0.00761577	<0.001	1	1	1
Genus:Flavobacterium	-0.713811	-1.07211	-0.109044	-0.062297	-0.242152	0.198452	0.211612	0.211713	0.211767	0.211842	0.0310672	<0.001	1	1	1
Genus:Flavisolibacter	-0.141001	-0.604478	0.266259	0.350648	1.15002	0.31658	0.325835	0.325933	0.325985	0.326058	1	1	1	1	0.041379
Genus:Dyadobacter	-0.970973	-1.80657	-0.220997	0.337479	-0.214762	0.328708	0.337713	0.337811	0.337862	0.337934	0.324658	<0.001	1	1	1
Genus:Devosia	-1.98134	-1.55926	-0.285529	0.341737	-0.187468	0.485255	0.492123	0.492217	0.492267	0.492337	0.00424263	0.138653	1	1	1
Genus:Caenimonas	-1.61291	-0.505603	-0.601951	-0.111129	0.0735502	0.441987	0.449298	0.449393	0.449444	0.449514	0.028004	1	1	1	1
Genus:Bdellovibrio	-0.808702	-0.882892	-0.325576	-1.18064	-1.05315	0.228841	0.24064	0.240741	0.240794	0.240869	0.0403193	0.0242273	1	<0.001	0.00125978
Family:Microbacteriaceae	-0.722855	-1.31293	0.258955	0.333088	-0.29882	0.364889	0.373243	0.37334	0.373391	0.373463	1	0.0428766	1	1	1
Family:LWQ8	-1.04934	-0.930204	-0.200307	-0.416	-0.452072	0.265941	0.276472	0.276572	0.276624	0.276698	0.0087069	0.0808605	1	1	1
Family:env.OPS_17	-0.695313	-0.899318	-0.0948602	-0.0465502	-0.0520551	0.160861	0.176325	0.176428	0.176482	0.176558	0.00165841	<0.001	1	1	1
Fungi	log2fold change					standard error					p value
taxon	CF	OF	IM	EM	EP	CF	OF	IM	EM	EP	CF	OF	IM	EM	EP
Genus:Vishniacozyma	0.588983	-0.341921	3.06923	1.87975	1.15511	0.443404	0.491757	0.503832	0.507308	0.509342	1	1	<0.001	0.0149132	1
Genus:Tricellula	-4.01444	-2.90781	3.59187	0.196032	0.256835	0.477002	0.523387	0.535441	0.538912	0.540944	<0.001	<0.001	<0.001	1	1
Genus:Sarocladium	-3.24658	-0.75982	1.90801	0.0353854	0.709213	0.620275	0.660363	0.672256	0.675685	0.677693	<0.001	1	0.293272	1	1
Genus:Rhizopus	-1.77562	-1.0667	0.169112	0.155363	0.210797	0.450504	0.498421	0.510493	0.513968	0.516002	0.00442686	1	1	1	1
Genus:Neosetophoma	-1.63348	-1.23778	0.977606	-0.540257	-0.219261	0.450314	0.498242	0.510314	0.513789	0.515823	0.0179324	0.761292	1	1	1
Genus:Neoascochyta	-2.18913	0.37819	2.03157	0.0195392	0.857752	0.525306	0.569238	0.581246	0.584705	0.586731	0.00217715	1	0.0320442	1	1
Genus:Leucosporidium	1.61059	-2.16039	2.70676	0.273233	-0.440219	0.567928	0.609996	0.621954	0.625401	0.627419	0.299972	0.0276944	0.000979873	1	1
Genus:Dioszegia	-0.980386	-1.35551	1.81406	1.41582	-0.150504	0.435071	0.48395	0.496029	0.499505	0.50154	1	0.329411	0.0185259	0.301346	1
Genus:Cryptococcus	0.537436	-1.94193	2.8616	0.496255	0.0952324	0.473827	0.520388	0.532445	0.535916	0.537949	1	0.0122952	<0.001	1	1
Genus:Clonostachys	-1.43883	0.0623183	0.131355	-0.0114722	-0.428962	0.395072	0.446722	0.4588	0.462273	0.464307	0.0188456	1	1	1	1
Genus:Archaeospora	-2.25554	-1.41062	0.64462	-0.137997	0.195006	0.604529	0.645181	0.657094	0.660528	0.662539	0.0140422	1	1	1	1
Family:Helotiales_fam_Incertae_sedis	-2.89612	-0.267146	0.873603	-0.67334	-0.362749	0.641938	0.681291	0.693156	0.696578	0.698582	<0.001	1	1	1	1
Family:Diversisporaceae	0.0638386	-2.41709	0.0792148	0.425292	-0.186855	0.661442	0.700171	0.712011	0.715426	0.717425	1	0.0370644	1	1	1
Family:Ceratobasidiaceae	0.0600303	-3.02713	0.177804	0.232107	-0.0401445	0.424142	0.473737	0.485818	0.489294	0.491329	1	<0.001	1	1	1

## Sheet: Table S4
Table S4: Differentially abundant bacterial and fungal taxa in experimental future climate treatment in a dry and normal spring season. Reported are ANCOMBC2 results including log2fold change of relative abundance, standard errors, and adjusted p values (Holm-method) of Dunnett's type of test for significance (n.a.: Entoloma was not detected in the dry year).
	log2fold change future vs ambient		standard error		p value
taxon	normal year	dry year	normal year	dry year	normal year	dry year
Aminobacter	0.434506	0.98	0.236271	0.226959	1	0.00835533
Tundrisphera	0.143331	1.08	0.279292	0.266472	1	0.0273017
Entoloma	-1.53	n.a.	0.40388	n.a.	0.0356863	n.a.
Hyalodendriella	-1.2	-0.875891	0.308246	0.287685	0.0226464	0.514876
Monosporoascus	0.95	0.772379	0.255155	0.291393	0.0480112	1

## Sheet: TableS5
Table S5: Correlation between soil moisture and land-use specific differentially abundant taxa between a dry and a normal year. Reported are Correlation coefficient (R value) according to Pearson Correlation and the respective p value at significance level (0.05).
Taxon	Correlation coefficient	p value
Bdellovibrio	0.130184	0.0661562
Caenimonas	0.0617128	0.385335
Devosia	-0.197074	0.00515707
Dyadobacter	0.105866	0.135704
Flavisolibacter	0.0836197	0.239111
Flavobacterium	0.207247	0.00323385
Luteolibacter	-0.0142349	0.841433
Methylobacterium.Methylorubrum	0.0945878	0.182769
Methylotenera	0.25455	<0.001
Promicromonospora	-0.0104207	0.883565
Rhizobacter	0.131007	0.0644457
Roseimicrobium	0.284029	<0.001
Tychonema_CCAP_1459.11B	0.119339	0.092346
Archaeospora	-0.0263569	0.711031
Clonostachys	-0.245422	<0.001
Cryptococcus	0.0753901	0.288687
Dioszegia	-0.0644218	0.364781
Leucosporidium	0.0959121	0.17669
Neoascochyta	-0.151396	0.0323558
Neosetophoma	-0.0800099	0.26007
Rhizopus	0.041755	0.557164
Sarocladium	-0.115242	0.104169
Tricellula	-0.00322005	0.963906
Vishniacozyma	-0.31282	<0.001

## Sheet: Table S6
Table S6: Differentially abundant fungaltrophic modes between land-use types. Reported are ANCOMBC2 results including log2fold change of relative abundance, standard errors, and adjusted p values (Holm method) of Dunnett's type of test for significance of each pairwise land-use type comparison. (Land use types: CF- conventional farming;OF - organic farming; IM - intensive meadow; EM - extensive m…
	normal year
	log2fold change										standard error										p value
taxon	OF - CF	IM - CF	EM- CF	EP - CF	IM - OF	EM - OF	EP - OF	EM - IM	EP - IM	EP - EM	OF - CF	IM - CF	EM- CF	EP - CF	IM - OF	EM - OF	EP - OF	EM - IM	EP - IM	EP - EM	OF - CF	IM - CF	EM- CF	EP - CF	IM - OF	EM - OF	EP - OF	EM - IM	EP - IM	EP - EM
animal parasite	-0.193365	0.641596	0.0866569	-0.00443862	0.834961	0.280022	0.188927	-0.554939	-0.646035	-0.0910955	0.137125	0.137125	0.137125	0.137125	0.162523	0.162523	0.162523	0.162523	0.162523	0.162523	0.1585	<0.001	0.527417	0.974178	<0.001	0.0848946	0.245049	0.000638944	<0.001	0.575133
soil saprotroph	0.0279307	-0.22037	-0.1504	-0.160561	-0.248301	-0.178331	-0.188492	0.0699698	0.0598091	-0.0101607	0.125053	0.125053	0.125053	0.125053	0.152457	0.152457	0.152457	0.152457	0.152457	0.152457	1	1	1	1	1	1	1	1	1	1
plant pathogen	-0.287462	-0.164745	-0.484312	-0.64628	0.122718	-0.19685	-0.358818	-0.319568	-0.481535	-0.161968	0.131285	0.131285	0.131285	0.131285	0.157618	0.157618	0.157618	0.157618	0.157618	0.157618	0.0285524	0.209527	<0.001	<0.001	0.43623	0.2117	0.0228161	0.0426133	0.00225004	0.30414
wood saprotroph	0.0558022	0.425289	0.345534	0.358407	0.369487	0.289732	0.302605	-0.0797547	-0.0668817	0.012873	0.161212	0.161212	0.161212	0.161212	0.183331	0.183331	0.183331	0.183331	0.183331	0.183331	1	1	1	1	1	1	1	1	1	1
mycoparasite	-0.00712647	0.398139	0.000419659	0.163262	0.405266	0.00754613	0.170388	-0.397719	-0.234877	0.162842	0.172664	0.172664	0.172664	0.172664	0.19349	0.19349	0.19349	0.19349	0.19349	0.19349	1	1	1	1	1	1	1	1	1	1
litter saprotroph	0.343803	-0.135906	-0.525491	-0.596087	-0.479709	-0.869294	-0.93989	-0.389585	-0.460181	-0.0705959	0.134783	0.134783	0.134783	0.134783	0.160548	0.160548	0.160548	0.160548	0.160548	0.160548	0.0107477	0.313294	<0.001	<0.001	0.00280863	<0.001	<0.001	0.0152414	0.00415289	0.660142
foliar endophyte	1.31923	1.45817	0.897089	0.880029	0.138932	-0.422144	-0.439205	-0.561077	-0.578137	-0.0170605	0.164873	0.164873	0.164873	0.164873	0.186562	0.186562	0.186562	0.186562	0.186562	0.186562	<0.001	<0.001	<0.001	<0.001	0.456455	0.0236509	0.0185626	0.0026345	0.00194243	0.927138
dung saprotroph	-0.218401	-0.850528	-0.719195	0.247214	-0.632127	-0.500793	0.465615	0.131333	1.09774	0.966408	0.182504	0.182504	0.182504	0.182504	0.202329	0.202329	0.202329	0.202329	0.202329	0.202329	0.231426	<0.001	<0.001	0.175555	0.00178255	0.0133181	0.0213758	0.516268	<0.001	<0.001
unspecified saprotroph	-0.0727927	-0.351668	-0.743751	-0.847352	-0.278875	-0.670959	-0.774559	-0.392083	-0.495684	-0.103601	0.159748	0.159748	0.159748	0.159748	0.182042	0.182042	0.182042	0.182042	0.182042	0.182042	0.648625	0.0277078	<0.001	<0.001	0.125541	<0.001	<0.001	0.0312557	0.00647107	0.569286
root endophyte	0.399672	3.07758	2.09605	1.86249	2.67791	1.69638	1.46282	-0.981533	-1.21509	-0.23356	0.51861	0.51861	0.51861	0.51861	0.52603	0.52603	0.52603	0.52603	0.52603	0.52603	0.440909	<0.001	<0.001	<0.001	<0.001	0.00126031	0.00542148	0.0620517	0.0208919	0.657039
lichenized	0.142745	2.8881	0.387926	0.644644	2.74535	0.245181	0.5019	-2.50017	-2.24345	0.256719	0.665968	0.665968	0.665968	0.665968	0.6718	0.6718	0.6718	0.6718	0.6718	0.6718	0.830281	<0.001	0.560231	0.333054	<0.001	0.71514	0.455005	<0.001	0.000839409	0.702361
nectar/tap saprotroph	-0.689644	-0.540756	1.75335	1.54661	0.148887	2.44299	2.23625	2.29411	2.08737	-0.20674	0.525946	0.525946	0.525946	0.525946	0.533266	0.533266	0.533266	0.533266	0.533266	0.533266	0.189775	0.303875	0.000856967	0.00327551	0.780092	<0.001	<0.001	<0.001	<0.001	0.698248
lichen parasite	0.240079	-0.00634326	-0.971964	-1.48417	-0.246422	-1.21204	-1.72425	-0.96562	-1.47783	-0.512209	0.375999	0.375999	0.375999	0.375999	0.386103	0.386103	0.386103	0.386103	0.386103	0.386103	0.523143	0.98654	0.00973745	<0.001	0.523325	0.00169429	<0.001	0.0123865	<0.001	0.184637
arbuscular mycorrhizal	1.04367	0.953286	2.09269	2.23521	-0.0903849	1.04902	1.19154	1.13941	1.28192	0.142515	0.339593	0.339593	0.339593	0.339593	0.350729	0.350729	0.350729	0.350729	0.350729	0.350729	0.00211704	0.00499828	<0.001	<0.001	0.796634	0.00278079	0.000680483	0.00115937	<0.001	0.684493
unspecified	0.0815857	-0.559933	-0.757247	-0.975403	-0.641519	-0.838833	-1.05699	-0.197314	-0.41547	-0.218155	0.284653	0.284653	0.284653	0.284653	0.297817	0.297817	0.297817	0.297817	0.297817	0.297817	0.774408	0.0491751	0.00780838	0.000611111	0.0312348	0.00485344	<0.001	0.507628	0.163001	0.463855
pollen saprotroph	0.117239	-0.720133	-0.370247	-0.260213	-0.837373	-0.487486	-0.377452	0.349887	0.45992	0.110034	0.222261	0.222261	0.222261	0.222261	0.23884	0.23884	0.23884	0.23884	0.23884	0.23884	0.597856	0.00119513	0.0957487	0.241697	<0.001	0.0412448	0.114025	0.142936	0.0541486	0.645012
sooty mold	0.386232	1.43453	-0.0962805	0.358385	1.0483	-0.482512	-0.0278466	-1.53081	-1.07615	0.454666	0.410599	0.410599	0.410599	0.410599	0.419886	0.419886	0.419886	0.419886	0.419886	0.419886	0.346882	<0.001	0.814606	0.382753	0.0125379	0.250493	0.947123	<0.001	0.0103786	0.278883
	dry year
	log2fold change										standard error										p value
taxon	OF - CF	IM - CF	EM- CF	EP - CF	IM - OF	EM - OF	EP - OF	EM - IM	EP - IM	EP - EM	OF - CF	IM - CF	EM- CF	EP - CF	IM - OF	EM - OF	EP - OF	EM - IM	EP - IM	EP - EM	OF - CF	IM - CF	EM- CF	EP - CF	IM - OF	EM - OF	EP - OF	EM - IM	EP - IM	EP - EM
animal parasite	-0.107857	0.396358	-0.180149	-0.14373	0.504215	-0.0722922	-0.0358724	-0.576508	-0.540088	0.0364198	0.144497	0.144497	0.144497	0.144497	0.167346	0.167346	0.167346	0.167346	0.167346	0.167346	0.455406	0.00608758	0.212494	0.319887	0.00258668	0.665747	0.830266	0.000571049	0.00124932	0.827716
soil saprotroph	0.107634	-0.359905	-0.374731	-0.303706	-0.467539	-0.482365	-0.41134	-0.0148262	0.0561994	0.0710256	0.119836	0.119836	0.119836	0.119836	0.146548	0.146548	0.146548	0.146548	0.146548	0.146548	0.369092	0.00267059	0.0017658	0.0112658	0.00142103	0.000996497	0.00500275	0.919416	0.701358	0.62792
plant pathogen	0.0394882	0.510031	-0.0652239	-0.158264	0.470542	-0.104712	-0.197752	-0.575254	-0.668294	-0.0930397	0.131003	0.131003	0.131003	0.131003	0.155827	0.155827	0.155827	0.155827	0.155827	0.155827	0.763086	<0.001	0.618567	0.227011	0.00253065	0.501598	0.204423	<0.001	<0.001	0.550459
wood saprotroph	0.240168	0.690269	0.452199	0.448893	0.450101	0.212031	0.208725	-0.238071	-0.241377	-0.00330597	0.159263	0.159263	0.159263	0.159263	0.180265	0.180265	0.180265	0.180265	0.180265	0.180265	0.131556	<0.001	0.004521	0.00482395	0.0125289	0.239508	0.246914	0.186611	0.180567	0.985368
mycoparasite	0.0492574	0.0154231	-0.434373	-0.451498	-0.0338342	-0.48363	-0.500756	-0.449796	-0.466922	-0.0171258	0.141944	0.141944	0.141944	0.141944	0.165144	0.165144	0.165144	0.165144	0.165144	0.165144	0.728577	0.913475	0.00221219	0.00146864	0.837668	0.00340569	0.00242753	0.00645643	0.00469343	0.917406
litter saprotroph	-0.177154	0.0142374	-0.276236	-0.471116	0.191392	-0.0990812	-0.293961	-0.290473	-0.485353	-0.19488	0.13683	0.13683	0.13683	0.13683	0.160764	0.160764	0.160764	0.160764	0.160764	0.160764	0.195424	0.917129	0.0435063	0.00057517	0.233844	0.537687	0.0674706	0.0707889	0.00253576	0.225431
foliar endophyte	0.864169	1.52196	0.55785	0.603908	0.657794	-0.306319	-0.260262	-0.964113	-0.918055	0.0460575	0.157665	0.157665	0.157665	0.157665	0.178853	0.178853	0.178853	0.178853	0.178853	0.178853	<0.001	<0.001	<0.001	<0.001	<0.001	0.0867704	0.145622	<0.001	<0.001	0.796781
dung saprotroph	-0.424034	-0.662151	-1.10872	0.179001	-0.238117	-0.684686	0.603035	-0.44657	0.841152	1.28772	0.184994	0.184994	0.184994	0.184994	0.203378	0.203378	0.203378	0.203378	0.203378	0.203378	0.0218969	<0.001	<0.001	0.333243	0.241675	0.000761075	0.00302583	0.0281087	<0.001	<0.001
unspecified saprotroph	-0.399908	-0.373394	-0.875891	-0.873989	0.0265139	-0.475983	-0.474081	-0.502497	-0.500595	0.00190189	0.153533	0.153533	0.153533	0.153533	0.175218	0.175218	0.175218	0.175218	0.175218	0.175218	0.00919556	0.0150155	<0.001	<0.001	0.879723	0.00659709	0.00681663	0.00413275	0.00427676	0.99134
root endophyte	-0.938372	1.53281	0.813644	0.613304	2.47118	1.75202	1.55168	-0.719164	-0.919504	-0.20034	0.41296	0.41296	0.41296	0.41296	0.421601	0.421601	0.421601	0.421601	0.421601	0.421601	0.0230678	<0.001	0.0488069	0.137506	4.5893e-09	<0.001	<0.001	0.0880468	0.0291848	0.634652
lichenized	0.27118	2.3846	0.248693	0.0342438	2.11342	-0.0224867	-0.236936	-2.13591	-2.35036	-0.214449	0.653559	0.653559	0.653559	0.653559	0.659109	0.659109	0.659109	0.659109	0.659109	0.659109	0.678195	<0.001	0.703559	0.958213	0.00134366	0.972784	0.719237	0.00119276	<0.001	0.744907
ectomycorrhizal	-0.833516	-0.517189	1.69794	2.85765	0.316327	2.53146	3.69116	2.21513	3.37484	1.15971	0.714547	0.714547	0.714547	0.714547	0.71964	0.71964	0.71964	0.71964	0.71964	0.71964	0.243414	0.469189	0.0174898	<0.001	0.660253	<0.001	<0.001	0.0020832	<0.001	0.107068
nectar/tap saprotroph	-0.430992	-0.797725	0.612044	1.50904	-0.366732	1.04304	1.94003	1.40977	2.30677	0.896998	0.529833	0.529833	0.529833	0.529833	0.536629	0.536629	0.536629	0.536629	0.536629	0.536629	0.415961	0.132166	0.248024	0.00439751	0.494354	0.0519339	<0.001	0.00861209	<0.001	0.0946149
lichen parasite	0.26656	0.597429	-1.13014	-1.38777	0.330869	-1.3967	-1.65433	-1.72756	-1.9852	-0.25764	0.41271	0.41271	0.41271	0.41271	0.421357	0.421357	0.421357	0.421357	0.421357	0.421357	0.518359	0.147736	0.00617529	0.000772153	0.432309	0.000917228	<0.001	<0.001	<0.001	0.5409
arbuscular mycorrhizal	2.85939	2.64611	4.27222	4.4578	-0.213285	1.41283	1.59841	1.62612	1.81169	0.185577	0.44528	0.44528	0.44528	0.44528	0.453317	0.453317	0.453317	0.453317	0.453317	0.453317	<0.001	<0.001	<0.001	<0.001	0.637998	0.00182916	<0.001	<0.001	<0.001	0.682263
unspecified	0.374853	-0.598257	-1.4255	-1.38111	-0.97311	-1.80035	-1.75597	-0.827241	-0.782857	0.0443839	0.335362	0.335362	0.335362	0.335362	0.345913	0.345913	0.345913	0.345913	0.345913	0.345913	0.263671	0.0744376	<0.001	<0.001	0.00490561	<0.001	<0.001	0.0167809	0.0236256	0.897904
pollen saprotroph	1.06074	-0.396747	-0.302037	-0.452803	-1.45748	-1.36277	-1.51354	0.0947103	-0.0560557	-0.150766	0.416309	0.416309	0.416309	0.416309	0.424884	0.424884	0.424884	0.424884	0.424884	0.424884	0.0108358	0.340585	0.468139	0.276745	0.000602893	0.0013394	<0.001	0.823607	0.895038	0.722709
unspecified pathotroph	1.63714	-0.0554126	-0.164188	-0.10017	-1.69256	-1.80133	-1.73731	-0.108775	-0.0447576	0.0640174	0.40296	0.40296	0.40296	0.40296	0.411808	0.411808	0.411808	0.411808	0.411808	0.411808	<0.001	0.890625	0.683675	0.803681	<0.001	<0.001	<0.001	0.791672	0.913452	0.876463
sooty mold	0.540757	2.36179	-0.240402	-0.12712	1.82103	-0.781159	-0.667877	-2.60219	-2.48891	0.113282	0.408127	0.408127	0.408127	0.408127	0.416867	0.416867	0.416867	0.416867	0.416867	0.416867	0.18518	<0.001	0.555837	0.755442	<0.001	0.060947	0.109126	<0.001	<0.001	0.785818
	dry vs normal year
	log2fold change					standard error					p value
taxon	CF	OF	IM	EM	EP	CF	OF	IM	EM	EP	CF	OF	IM	EM	EP
Phylum:animal_parasite	0.116484	0.202426	-0.12812	-0.150212	-0.0219205	0.141114	0.165501	0.165501	0.165501	0.165501	1	1	1	1	1
Phylum:soil_saprotroph	0.000380873	0.0805173	-0.138521	-0.223841	-0.141878	0.122929	0.150165	0.150166	0.150166	0.150166	1	1	1	1	1
Phylum:plant_pathogen	-0.572209	-0.244825	0.1032	-0.153011	-0.0833064	0.132505	0.158167	0.158167	0.158167	0.158167	0.000691552	1	1	1	1
Phylum:wood_saprotroph	-0.276407	-0.0916078	-0.0107928	-0.169633	-0.185035	0.16017	0.182126	0.182127	0.182127	0.182127	1	1	1	1	1
Phylum:mycoparasite	0.110608	0.167425	-0.271474	-0.324075	-0.503266	0.158095	0.180293	0.180294	0.180294	0.180294	1	1	1	1	0.215194
Phylum:litter_saprotroph	-0.229459	-0.749983	-0.0786818	0.019906	-0.103601	0.135887	0.161033	0.161034	0.161034	0.161034	1	<0.001	1	1	1
Phylum:foliar_endophyte	0.186457	-0.268174	0.250888	-0.152672	-0.0887777	0.168774	0.189781	0.189782	0.189782	0.189782	1	1	1	1	1
Phylum:dung_saprotroph	-0.0203532	-0.225553	0.168658	-0.40977	-0.0876802	0.183492	0.20305	0.20305	0.20305	0.20305	1	1	1	0.784513	1
Phylum:unspecified_saprotroph	-0.35891	-0.685592	-0.380003	-0.490941	-0.384661	0.157436	0.179711	0.179712	0.179712	0.179712	0.407231	0.00435849	0.48108	0.157466	0.48108
Phylum:root_endophyte	1.72877	0.391161	0.184631	0.446477	0.480473	0.469283	0.477787	0.477787	0.477787	0.477787	0.00758111	1	1	1	1
Phylum:lichenized	0.0215687	0.150437	-0.481289	-0.117554	-0.587945	0.673825	0.680026	0.680027	0.680027	0.680027	1	1	1	1	1
Phylum:nectar/tap_saprotroph	-0.282125	-0.0230405	-0.53846	-1.42332	-0.318807	0.526869	0.534547	0.534548	0.534548	0.534548	1	1	1	0.217069	1
Phylum:lichen_parasite	-0.429856	-0.402941	0.17455	-0.587918	-0.332572	0.39483	0.404746	0.404746	0.404746	0.404746	1	1	1	1	1
Phylum:arbuscular_mycorrhizal	-1.99099	-0.174837	-0.297537	0.188647	0.232486	0.398018	0.407862	0.407863	0.407863	0.407863	<0.001	1	1	1	1
Phylum:unspecified	-0.243003	0.0506975	-0.280693	-0.911144	-0.647828	0.315732	0.327842	0.327843	0.327843	0.327843	1	1	1	0.163475	0.914873
Phylum:pollen_saprotroph	-0.445908	0.498022	-0.121888	-0.377588	-0.637611	0.338958	0.350322	0.350323	0.350323	0.350323	1	1	1	1	1
Phylum:sooty_mold	0.0631898	0.218149	0.991083	-0.0808218	-0.421429	0.409408	0.419008	0.419009	0.419009	0.419008	1	1	0.540456	1	1

## Sheet: Table S7
Table S7: Taxa and their trophic status within the prominent fungal cluster of microbial co-occurrence networks. Fungal families that formed the cluster within each land-use types in the dry or wet year are summarized as well as their primary trophic forms according to FungalTraits (NA in case no trophic form was assigned). For extensive meadows there is no reporting as no prominent fungal cluste…
Land use	normal year		dry year
Conventional farming	family	trophic status	family	trophic status
	Claroideoglomeraceae	NA	Stephanosporaceae	wood saprotroph
	Hypocreales_fam_Incertae_sedis	dung saprotroph	Capnodiaceae	sooty mold
	Agaricales_fam_Incertae_sedis	soil/litter/dung saprotroph	Tubeufiaceae	wood saprotroph
	Tubeufiaceae	wood saprotroph	Extremaceae	NA
	Extremaceae	NA	Diversisporaceae	arbuscular mycorrhizal
	Paraglomeraceae	arbuscular mycorrhizal	Aspergillaceae	unspecified saprotroph
	Mycosphaerellaceae	plant pathogen	Sordariaceae	dung saprotroph
	Entrophosporaceae	arbuscular mycorrhizal	Phomatosporaceae	wood saprotroph
			Paraglomeraceae	arbuscular mycorrhizal
			Operculomycetaceae	pollen saprotroph
			Saccharomycetaceae	nectar/tap saprotroph
			Leucosporidiaceae	soil saprotroph
			Agaricales_fam_Incertae_sedis	soil/litter/dung saprotroph
			Pulvinulaceae	ectomycorrhizal
			Debaryomycetaceae	nectar/tap saprotroph
Organic farming	family	trophic status	family	trophic status
	Hygrophoraceae	soil/litter saprotroph	Hygrophoraceae	soil/litter saprotroph
	Cordycipitaceae	animal parasite	Cordycipitaceae	animal parasite
	Agaricales_fam_Incertae_sedis	soil/litter/dung saprotroph	Debaryomycetaceae	nectar/tap saprotroph
	Cyphellophoraceae	litter saprotroph	Serendipitaceae	root endophyte
	Extremaceae	NA	Saccharomycetaceae	nectar/tap saprotroph
	Serendipitaceae	root endophyte	Microdochiaceae	plant pathogen
	Limnoperdaceae	wood saprotroph	Hypocreales_fam_Incertae_sedis	dung saprotroph
	Cystobasidiaceae	mycoparasite	Phomatosporaceae	wood saprotroph
	Calcarisporiellaceae	soil saprotroph	Cystobasidiaceae	mycoparasite
	Paraglomeraceae	arbuscular mycorrhizal	Paraglomeraceae	arbuscular mycorrhizal
	Aspergillaceae	unspecified saprotroph	Aspergillaceae	unspecified saprotroph
	Tubeufiaceae	wood saprotroph	Limnoperdaceae	wood saprotroph
	Shiraiaceae	plant pathogen	Extremaceae	NA
	Claroideoglomeraceae	NA	Claroideoglomeraceae	NA
	Hypocreales_fam_Incertae_sedis	dung saprotroph	Tubeufiaceae	wood saprotroph
	Debaryomycetaceae	nectar/tap saprotroph	Stephanosporaceae	wood saprotroph
	Stephanosporaceae	wood saprotroph	Agaricales_fam_Incertae_sedis	soil/litter/dung saprotroph
	Operculomycetaceae	pollen saprotroph
	Psathyrellaceae	soil wood saprotroph
	Pyxidiophoraceae	litter saprotroph
	Sordariaceae	dung saprotroph
	Saccharomycetaceae	nectar/tap saprotroph
	Phomatosporaceae	wood saprotroph
Intensive meadow	family	trophic status	family	trophic status
	Hoehnelomycetaceae	unspecified saprotroph	Stephanosporaceae	wood saprotroph
	Alphamycetaceae	pollen saprotroph	Alphamycetaceae	pollen saprotroph
	Tubeufiaceae	wood saprotroph	Saccharomycetaceae	nectar/tap saprotroph
	Microdochiaceae	plant pathogen	Tubeufiaceae	wood saprotroph
	Claroideoglomeraceae	NA	Cystobasidiaceae	mycoparasite
	Extremaceae	NA	Extremaceae	NA
	Filobasidiaceae	unspecified litter saprotroph	Claroideoglomeraceae	NA
	Pyxidiophoraceae	litter saprotroph	Hoehnelomycetaceae	unspecified saprotroph
	Protomycetaceae	plant pathogen	Debaryomycetaceae	nectar/tap saprotroph
	Hygrophoraceae	soil/litter saprotroph
	Debaryomycetaceae	nectar/tap saprotroph
Extensive pasture	family	trophic status	family	trophic status
	Agaricales_fam_Incertae_sedis	soil litter dung saprotroph	Agaricales_fam_Incertae_sedis	soil litter dung saprotroph
	Arachnomycetaceae	animal parasite	Junewangiaceae	wood saprotroph
	Hoehnelomycetaceae	unspecified saprotroph	Hoehnelomycetaceae	unspecified saprotroph
	Bombardiaceae	soil saprotroph	Cystobasidiaceae	mycoparasite
	Cystobasidiaceae	mycoparasite	Strophariaceae	soil litter wood saprotrophs
	Leptosphaeriaceae	plant pathogen	Bombardiaceae	soil saprotroph
	Protomycetaceae	plant pathogen	Capnodiaceae	sooty mold
	Alphamycetaceae	pollen saprotroph	Alphamycetaceae	pollen saprotroph
	Eremomycetaceae	unspecified saprotroph	Podosporaceae	unspecified dung saprotroph

## Sheet: Table S8
Table S8: Keystone taxa in microbial co-occurrence networks of different land-use types in a dry and a normal year. Key stone taxa were defined as taxa with the highest degree (>10) within the respective network. Additionally, their relative abundance within the bacterial (B) or fungal (F) community, as well as the primary trophic form for fungi according to FungalTraits database are reported.
Land use	dry year key stone taxa				normal year key stone taxa
Conventional farming	key taxa	degree	relative abundance	fungal trophic form	key taxa	degree	relative abundance	fungal trophic form
	Debaryomycetaceae (F)	18	<0.0001	nectar/tap_saprotroph	Geminicoccaceae (B)	14	0.0109	NA
	Pulvinulaceae (F)	16	0.0006	ectomycorrhizal (some species are saprotophs)	Nectriaceae (F)	13	0.144	plant_pathogen
	Agaricales_fam_Incertae_sedis (F)	15	0.0001	liite_soil_dung_saprotrophs	Solirubrobacteraceae (B)	12	0.0277	NA
	Aspergillaceae (F)	14	0.0006	unspecified_saprotroph	Hymenobacteraceae (B)	12	0.0024	NA
	Phomatosporaceae (F)	14	<0.0001	wood_saprotroph	Chaetosphaeriaceae (F)	12	0.0029	litter_saprotroph
	Gemmatimonadaceae (B)	12	0.0185	NA	Rubrobacteriaceae (B)	11	0.0076	NA
	Microbacteriaceae (B)	11	0.0085	NA	Mycosphaerellaceae (F)	11	<0.0001	plant_pathogen
					Entrophosporaceae (F)	11	0.0003	arbuscular_mycorrhizal (root_associated)
Organic farming	key taxa	degree	relative abundance	fungal trophic form	key taxa	degree	relative abundance	fungal trophic form
	Hygrophoraceae (F)	21	<0.0001	litter_soil_wood_saprotrophs	Cordycipitaceae (F)	30	0.0002	animal_parasite
	Cordycipitaceae (F)	19	<0.0001	animal_parasite	Hygrophoraceae (F)	29	0.0008	litter_soil_wood_saprotrophs
	Debaryomycetaceae (F)	17	<0.0001	nectar/tap_saprotroph	Cyphellophoraceae (F)	25	<0.0001	litter_saprotroph
	Agaricales_fam_Incertae_sedis (F)	17	0.0005	liite_soil_dung_saprotrophs	Agaricales_fam_Incertae_sedis (F)	23	<0.0001	liite_soil_dung_saprotrophs
	Aspergillaceae (F)	16	<0.0001	unspecified_saprotroph	Debaryomycetaceae (F)	22	<0.0001	nectar/tap_saprotroph
	Sutterellaceae (B)	11	0.0018	NA	Pirellulaceae (B)	13	0.0111	NA
	Koribacteraceae (B)	11	0.0003	NA	Streptomycetaceae (B)	12	0.0135	NA
	Latescibacteraceae (B)	11	0.0003	NA	Geminicoccaceae (B)	12	0.0114	NA
					Beijerinckiaceae (B)	11	0.011	NA
					Nocardioidaceae (B)	11	0.0314	NA
					Gemmatimonadaceae (B)	11	0.0185	NA
					Bdellovibrionaceae (B)	11	0.0027	NA
					Melanommataceae (F)	11	0.004	plant_pathogen_wood_saprotroph
Intensive Meadow	key taxa	degree	relative abundance	fungal trophic form	key taxa	degree	relative abundance	fungal trophic form
	Lachnospiraceae (B)	13	0.0014	NA	A21b (B)	14	0.0004	NA
	Woeseiaceae (B)	12	0.0002	NA	Sporichthyaceae (B)	12	0.004	NA
	Debaryomycetaceae (F)	12	<0.0001	nectar/tap_saprotroph	Hoehnelomycetaceae (F)	12	<0.0001	unspecified_saprotroph
	Chitinophagaceae (B)	11	0.0123	NA	Pirellulaceae (B)	11	0.0095	NA
	Verrucomicrobiaceae (B)	11	0.0014	NA	Burkholderiaceae (B)	11	0.0005	NA
	Solibacteraceae (B)	11	0.0008	NA	Hygrophoraceae (F)	11	0.0007	litter_soil_wood_saprotrophs
	Tepidimicrobium (B)	11	0.0002	NA	Debaryomycetaceae (F)	11	<0.0001	nectar/tap_saprotroph
	Hoehnelomycetaceae (F)	11	0.0001	unspecified_saprotroph
	Schizoporaceae (F)	11	0.0015	wood_saprotroph
	Sarocladiaceae (F)	11	0.0021	plant_pathogen
Extensive Meadow	key taxa	degree	relative abundance	fungal trophic form	key taxa	degree	relative abundance	fungal trophic form
	Hyaloscyphaceae (F)	13	0.0002	NA	Geminicoccaceae (B)	13	0.0116	NA
	Chthoniobacteraceae (B)	11	0.0146	NA	Xanthobacteraceae (B)	12	0.033	NA
	Sphingobacteriaceae (B)	11	0.0015	NA	Gaiellaceae (B)	12	0.04	NA
	Erysipelotrichaceae (B)	11	<0.0001	NA	Mycobacteriaceae (B)	12	0.0096	NA
	Chloroflexaceae (B)	11	<0.0001	NA	Piskurozymaceae (F)	12	0.0402	soil_saprotroph
	Plectosphaerellaceae (F)	11	0.0367	plant_pathogen_soil_saprotrophs	Stachybotryaceae (F)	12	0.0114	soil_saprotroph
	Coniochaetaceae (F)	11	0.0027	unspecified_saprotroph	Planococcaceae (B)	11	0.0163	NA
					Paenibacillaceae (B)	11	0.0133	NA
					Chthoniobacteraceae (B)	11	0.0152	NA
					Ilumatobacteraceae (B)	11	0.0152	NA
					Isosphaeraceae (B)	11	0.0078	NA
					Microscillaceae (B)	11	0.0056	NA
					Hygrophoraceae (F)	11	0.0387	litter_soil_wood_saprotrophs
					Didymellaceae (F)	11	0.0088	plant_pathogen_litter_saprotroph
Extensive Pasture	key taxa	degree	relative abundance	fungal trophic form	key taxa	degree	relative abundance	fungal trophic form
	Gaiellaceae (B)	13	0.0359	NA	Piskurozymaceae (F)	16	0.0215	soil_saprotroph
	Verrucomicrobiaceae (B)	13	0.0014	NA	WD2101_soil_group (B)	12	0.0045	NA
	Neopyrenochaetaceae (F)	13	0.0012	unspecified_saprotroph	Hoehnelomycetaceae (F)	12	<0.0001	unspecified_saprotroph
	Ramicandelaberaceae (F)	13	0.0015	soil_saprotroph	Arachnomycetaceae (F)	12	<0.0001	animal_parasite (second is dung_saprotroph)
	Vicinamibacteraceae (B)	12	0.027	NA	Schizoporaceae (F)	12	0.0008	wood_saprotroph
	Pannariaceae (F)	12	0.0015	lichenized	Gemmatimonadaceae (B)	11	0.0144	NA
	Solirubrobacteraceae (B)	11	0.0283	NA	Sphingomonadaceae (B)	11	0.009	NA
	Streptomycetaceae (B)	11	0.0086	NA	Microscillaceae (B)	11	0.0066	NA
	Sutterellaceae (B)	11	0.0017	NA	Pirellulaceae (B)	11	0.0111	NA
	Pseudohongiellaceae (B)	11	0.0002	NA	Thermoactinomycetaceae (B)	11	0.0018	NA
	Chthonomonadaceae (B)	11	0.0001	NA	Koribacteraceae (B)	11	0.0001	NA
	Chaetomiaceae (F)	11	0.0231	litter_wood_saprotroph	Nectriaceae (F)	11	0.0752	plant_pathogen
	Podosporaceae (F)	11	0.0011	unspecified_dung_saprotroph	Agaricales_fam_Incertae_sedis (F)	11	0.0005	liite_soil_dung_saprotrophs
					Saccharomycetaceae (F)	11	0.0005	nectar/tap_saprotroph

## Sheet: Table S9
Table S9: Structural equation models in cropland, grassland and including all land uses over dry and normal year. Land use (CF - conventional farming, OF - organic farming, IM - intensive meadow, EM - extensive meadow, EP - extensive pasture), climate (A - ambient, F - future) and year effects (2022 - dry spring, 2023 - normal spring) on soil parameters as well as microbial diversity and activity…
SEM cropland						SEM grassland						SEM with all land uses
Response	Predictor	Estimate	Standard error	Df	p value	Response	Predictor	Estimate	Standard error	Df	p value	Response	Predictor	Estimate	Standard error	Df	p value
Moisture	LANDUSE	-	-	1	0.0227	Moisture	LANDUSE	-	-	1	<0.001	Moisture	LANDUSE	-	-	4	<0.001
Moisture	LANDUSE = CF	0.1055	0.1857	12.7331	0.5797	Moisture	LANDUSE = IM	-0.7642	0.1202	27.2294	<0.001	Moisture	LANDUSE = IM	-0.7642	0.1453	35.0161	<0.001
Moisture	LANDUSE = OF	0.4533	0.1857	12.7331	0.03	Moisture	LANDUSE = EM	0.2842	0.1202	27.2294	0.0254	Moisture	LANDUSE = EP	-0.0789	0.1453	35.0161	0.5908
Moisture	YEAR	-	-	1	<0.001	Moisture	YEAR	-	-	1	<0.001	Moisture	LANDUSE = CF	0.1055	0.1453	35.0161	0.4726
Moisture	YEAR = 2022	-0.0237	0.1857	12.7331	0.9004	Moisture	YEAR = 2022	-0.6939	0.1202	27.2294	<0.001	Moisture	LANDUSE = EM	0.2842	0.1453	35.0161	0.0585
Moisture	YEAR = 2023	0.5826	0.1857	12.7331	0.008	Moisture	YEAR = 2023	0.2139	0.1202	27.2294	0.0862	Moisture	LANDUSE = OF	0.4533	0.1453	35.0161	0.0036
Microbial C	Moisture	0.329	0.1034	69.2182	0.0022	Microbial C	Moisture	0.5718	0.1365	70.3857	0.0001	Moisture	CLIMATE	-	-	1	0.1888
Microbial C	LANDUSE	-	-	1	0.0233	Microbial C	LANDUSE	-	-	1	0.8123	Moisture	CLIMATE = A	-0.1424	0.1401	8	0.3395
Microbial C	LANDUSE = OF	-0.5155	0.1392	14.188	0.0023	Microbial C	LANDUSE = IM	0.2037	0.2176	15.2167	0.3636	Moisture	CLIMATE = F	0.1424	0.1401	8	0.3395
Microbial C	LANDUSE = CF	-0.1772	0.1392	14.188	0.2234	Microbial C	LANDUSE = EM	0.2594	0.2176	15.2167	0.2514	Moisture	YEAR	-	-	1	<0.001
Microbial C	CLIMATE	-	-	1	0.7288	Microbial C	CLIMATE	-	-	1	0.7973	Moisture	YEAR = 2022	-0.4425	0.1125	13.2203	0.0017
Microbial C	CLIMATE = A	-0.3893	0.1682	7.7471	0.0504	Microbial C	CLIMATE = A	0.1826	0.2604	8.0369	0.503	Moisture	YEAR = 2023	0.4425	0.1125	13.2203	0.0017
Microbial C	CLIMATE = F	-0.3034	0.1682	7.7471	0.1102	Microbial C	CLIMATE = F	0.2806	0.2604	8.0369	0.3125	Microbial C	Moisture	0.4559	0.0791	190.297	<0.001
Microbial C	YEAR	-	-	1	0.0405	Microbial C	YEAR	-	-	1	<0.001	Microbial C	LANDUSE	-	-	4	<0.001
Microbial C	YEAR = 2022	-0.5084	0.1417	14.8708	0.0027	Microbial C	YEAR = 2023	-0.257	0.2146	14.4793	0.2502	Microbial C	LANDUSE = OF	-0.665	0.1904	21.9866	0.0021
Microbial C	YEAR = 2023	-0.1843	0.1417	14.8708	0.2132	Microbial C	YEAR = 2022	0.7202	0.2146	14.4793	0.0045	Microbial C	LANDUSE = CF	-0.2825	0.1871	20.6495	0.1462
Fungal community composition	Moi.Soi	0.0016	0.0107	62.0181	0.8823	Fungal community composition	Moi.Soi	0.0277	0.011	70.2084	0.0138	Microbial C	LANDUSE = IM	0.2524	0.1966	24.6702	0.211
Fungal community composition	LANDUSE	-	-	1	0.0075	Fungal community composition	LANDUSE	-	-	1	<0.001	Microbial C	LANDUSE = EP	0.2655	0.187	20.6161	0.1707
Fungal community composition	LANDUSE = CF	-0.2263	0.0133	16.8279	<0.001	Fungal community composition	LANDUSE = IM	0.0536	0.0179	14.689	0.0092	Microbial C	LANDUSE = EM	0.4296	0.1883	21.1252	0.033
Fungal community composition	LANDUSE = OF	-0.1834	0.0133	16.8279	<0.001	Fungal community composition	LANDUSE = EM	0.1537	0.0179	14.689	<0.001	Microbial C	CLIMATE	-	-	1	0.8458
Fungal community composition	CLIMATE	-	-	1	0.1041	Fungal community composition	CLIMATE	-	-	1	0.8054	Microbial C	CLIMATE = A	-0.0296	0.2079	8.0007	0.8904
Fungal community composition	CLIMATE = F	-0.2248	0.0153	7.6766	<0.001	Fungal community composition	CLIMATE = A	0.0998	0.0216	8.0346	0.0017	Microbial C	CLIMATE = F	0.0296	0.2079	8.0007	0.8904
Fungal community composition	CLIMATE = A	-0.1849	0.0153	7.6766	<0.001	Fungal community composition	CLIMATE = F	0.1076	0.0216	8.0346	0.0011	Microbial C	YEAR	-	-	1	0.0017
Fungal community composition	YEAR	-	-	1	0.0022	Fungal community composition	YEAR	-	-	1	0.7118	Microbial C	YEAR = 2023	-0.2152	0.1617	11.6374	0.2086
Fungal community composition	YEAR = 2023	-0.231	0.0135	17.6113	<0.001	Fungal community composition	YEAR = 2023	0.1004	0.0177	14.0053	0.0001	Microbial C	YEAR = 2022	0.2152	0.1617	11.6374	0.2086
Fungal community composition	YEAR = 2022	-0.1787	0.0135	17.6113	<0.001	Fungal community composition	YEAR = 2022	0.107	0.0177	14.0053	<0.001	Fungal community composition	Moi.Soi	0.017	0.0064	192	0.0083
Bacterial community composition	Microbial C	0.0228	0.0109	67.156	0.0395	Bacterial community composition	Microbial C	0.0252	0.0098	67.4475	0.0126	Fungal community composition	LANDUSE	-	-	4	<0.001
Bacterial community composition	LANDUSE	-	-	1	0.3023	Bacterial community composition	LANDUSE	-	-	1	0.4747	Fungal community composition	LANDUSE = CF	-0.2283	0.0111	116.292	<0.001
Bacterial community composition	LANDUSE = OF	-0.0061	0.0803	8.1196	0.9411	Bacterial community composition	LANDUSE = EM	-0.0215	0.0798	8.1991	0.7939	Fungal community composition	LANDUSE = OF	-0.1909	0.0115	118.726	<0.001
Bacterial community composition	LANDUSE = CF	0.0084	0.0803	8.1196	0.9195	Bacterial community composition	LANDUSE = IM	-0.0086	0.0798	8.1991	0.9164	Fungal community composition	LANDUSE = IM	0.0521	0.0122	122.784	<0.001
Bacterial community composition	CLIMATE	-	-	1	0.5078	Bacterial community composition	CLIMATE	-	-	1	0.6069	Fungal community composition	LANDUSE = EM	0.1634	0.0112	117.195	<0.001
Bacterial community composition	CLIMATE = A	-0.0543	0.1131	7.9988	0.6439	Bacterial community composition	CLIMATE = A	-0.0575	0.1121	7.9953	0.6217	Fungal community composition	LANDUSE = EP	0.2037	0.0111	116.227	<0.001
Bacterial community composition	CLIMATE = F	0.0566	0.1131	7.9988	0.6305	Bacterial community composition	CLIMATE = F	0.0274	0.1121	7.9953	0.8133	Fungal community composition	CLIMATE	-	-	1	0.1412
Bacterial community composition	YEAR	-	-	1	0.1507	Bacterial community composition	YEAR	-	-	1	0.5424	Fungal community composition	CLIMATE = F	-0.0082	0.0071	7.9842	0.2791
Bacterial community composition	YEAR = 2023	-0.0097	0.0803	8.1362	0.9071	Bacterial community composition	YEAR = 2022	-0.0204	0.0797	8.1855	0.8044	Fungal community composition	CLIMATE = A	0.0082	0.0071	7.9842	0.2791
Bacterial community composition	YEAR = 2022	0.0119	0.0803	8.1362	0.8856	Bacterial community composition	YEAR = 2023	-0.0098	0.0797	8.1855	0.9054	Fungal community composition	YEAR	-	-	1	0.0155
Activity_index	Bacterial community composition	-0.9315	0.2827	8.971	0.0093	Activity_index	Bacterial community composition	-1.2324	0.3103	78	<0.001	Fungal community composition	YEAR = 2023	-0.014	0.0076	36.3287	0.0725
Activity_index	Microbial C	-0.0252	0.0673	73.7833	0.7088	network_complexity	LANDUSE	-	-	1	<0.001	Fungal community composition	YEAR = 2022	0.014	0.0076	36.3287	0.0725
Activity_index	LANDUSE	-	-	1	<0.001	network_complexity	LANDUSE = EM	0.587	0.0103	31.7922	<0.001	Bacterial community composition	Microbial C	0.0267	0.0057	184.235	<0.001
Activity_index	LANDUSE = OF	-0.686	0.0831	14.9676	<0.001	network_complexity	LANDUSE = IM	1.0126	0.0103	31.7922	<0.001	Bacterial community composition	LANDUSE	-	-	4	0.0071
Activity_index	LANDUSE = CF	-0.0145	0.0831	14.9676	0.8638	network_complexity	YEAR	-	-	1	<0.001	Bacterial community composition	LANDUSE = EM	-0.0282	0.0793	8.2738	0.7309
Activity_index	CLIMATE	-	-	1	0.6578	network_complexity	YEAR = 2023	0.4579	0.0103	31.7922	<0.001	Bacterial community composition	LANDUSE = IM	-0.0143	0.0793	8.248	0.8611
Activity_index	CLIMATE = F	-0.3826	0.0977	6.9771	0.0058	network_complexity	YEAR = 2022	1.1417	0.0103	31.7922	<0.001	Bacterial community composition	LANDUSE = OF	0.0036	0.0793	8.2651	0.9652
Activity_index	CLIMATE = A	-0.3178	0.0977	6.9771	0.014							Bacterial community composition	LANDUSE = CF	0.0172	0.0793	8.2519	0.8336
network_complexity	LANDUSE	-	-	1	<0.001							Bacterial community composition	LANDUSE = EP	0.0218	0.0793	8.2517	0.7902
network_complexity	LANDUSE = CF	-1.2992	0.0106	31.7922	<0.001							Bacterial community composition	CLIMATE	-	-	1	0.5934
network_complexity	LANDUSE = OF	0.2228	0.0106	31.7922	<0.001							Bacterial community composition	CLIMATE = A	-0.0437	0.1112	7.9991	0.7045
network_complexity	YEAR	-	-	1	<0.001							Bacterial community composition	CLIMATE = F	0.0437	0.1112	7.9991	0.7045
network_complexity	YEAR = 2022	-0.7147	0.0106	31.7922	<0.001							Bacterial community composition	YEAR	-	-	1	0.6831
network_complexity	YEAR = 2023	-0.3617	0.0106	31.7922	<0.001							Bacterial community composition	YEAR = 2023	-0.002	0.0788	8.0605	0.9804
												Bacterial community composition	YEAR = 2022	0.002	0.0788	8.0605	0.9804
												Activity_index	Bacterial community composition	-1.2411	0.2294	11.399	0.0002
												Activity_index	Microbial C	0.1572	0.0461	188.005	0.0008
												Activity_index	LANDUSE	-	-	4	<0.001
												Activity_index	LANDUSE = OF	-0.6127	0.0995	65.7822	<0.001
												Activity_index	LANDUSE = EP	0.0213	0.0978	62.6101	0.8285
												Activity_index	LANDUSE = CF	0.024	0.0979	63.105	0.8075
												Activity_index	LANDUSE = EM	0.214	0.1009	67.2127	0.0377
												Activity_index	LANDUSE = IM	0.3534	0.0974	62.2475	0.0006
